# Supplementary material for: What proportion of patients report long-term pain after total hip or knee replacement for osteoarthritis? A systematic review of prospective studies in unselected patients
Source: PubMed Central journal article supplement — BMJ Open. 2012 Feb 22;2(1):e000435. doi: 10.1136/bmjopen-2011-000435 (PMC3289991; doi:10.1136/bmjopen-2011-000435), 2012-02-22
Supplement: bmjopen-2011-000435-s1.pdf [file bmjopen-2011-000435-s1.pdf]

## Appendix 1. MOOSE Checklist

| <b>Reporting of background should include</b>                                           |                                                                                                                                                                                                                                                                                                                                                                                                                                                           |
|-----------------------------------------------------------------------------------------|-----------------------------------------------------------------------------------------------------------------------------------------------------------------------------------------------------------------------------------------------------------------------------------------------------------------------------------------------------------------------------------------------------------------------------------------------------------|
| Problem definition                                                                      | Introduction                                                                                                                                                                                                                                                                                                                                                                                                                                              |
| Hypothesis statement                                                                    | Introduction paragraph 4. "Reporting of pain outcomes in the orthopaedic literature frequently emphasises improvement in mean scores. To advise both patients and their healthcare professionals, it is important to have a clear understanding of the frequency and extent of pain following total hip or knee replacement. In the absence of appropriate clinical trials, the best way to explore this is the prospective study of unselected patients" |
| Description of study outcome(s)                                                         | Background paragraph 4<br>Methods/ Data sources and searches: disease specific patient reported outcome measures described<br>Data synthesis and analysis                                                                                                                                                                                                                                                                                                 |
| Type of exposure or intervention used                                                   | Background. Total hip or knee replacement                                                                                                                                                                                                                                                                                                                                                                                                                 |
| Type of study designs used                                                              | Methods/ Study selection. Prospective studies in consecutive/ unselected populations                                                                                                                                                                                                                                                                                                                                                                      |
| Study population                                                                        | Methods/ Study selection. Prospective studies in consecutive/ unselected populations                                                                                                                                                                                                                                                                                                                                                                      |
| <b>Reporting of search strategy should include</b>                                      |                                                                                                                                                                                                                                                                                                                                                                                                                                                           |
| Qualifications of searchers (eg, librarians and investigators)                          | Methods/ Study selection. Researchers experienced in systematic reviews and rheumatology                                                                                                                                                                                                                                                                                                                                                                  |
| Search strategy, including time period included in the synthesis and keywords           | Methods/ Data sources and searches, and Appendix 2                                                                                                                                                                                                                                                                                                                                                                                                        |
| Effort to include all available studies, including contact with authors                 | Methods/ Data extraction and Quality assessment. We did not contact authors. Potentially, data is available not just from published studies with mean pain outcome scores. It is also available as routinely collected data. We included only published studies in representative populations with appropriate outcome data. Also considered in Discussion Methods/ Study selection.                                                                      |
| Databases and registries searched                                                       | Methods/ Data sources and searches                                                                                                                                                                                                                                                                                                                                                                                                                        |
| Search software used, name and version, including special features used (eg, explosion) | Methods/ Data sources and searches.                                                                                                                                                                                                                                                                                                                                                                                                                       |
| Use of hand searching (eg, reference lists of obtained articles)                        | Methods/ Data sources and searches.                                                                                                                                                                                                                                                                                                                                                                                                                       |
| List of citations located and those excluded,                                           | PRISMA style flow diagram shown in                                                                                                                                                                                                                                                                                                                                                                                                                        |

|                                                                                                                                            |                                                                                                                                                                                                                                                                                                                                                                                                                                                                                                                                                                                            |
|--------------------------------------------------------------------------------------------------------------------------------------------|--------------------------------------------------------------------------------------------------------------------------------------------------------------------------------------------------------------------------------------------------------------------------------------------------------------------------------------------------------------------------------------------------------------------------------------------------------------------------------------------------------------------------------------------------------------------------------------------|
| including justification                                                                                                                    | Figure 1                                                                                                                                                                                                                                                                                                                                                                                                                                                                                                                                                                                   |
| Method of addressing articles published in languages other than English                                                                    | Methods/ Data sources and searches. No exclusions on basis of language. No studies were identified that were not published in English                                                                                                                                                                                                                                                                                                                                                                                                                                                      |
| Method of handling abstracts and unpublished studies                                                                                       | Methods/ Data sources and searches. We did not include studies only published as abstracts                                                                                                                                                                                                                                                                                                                                                                                                                                                                                                 |
| Description of any contact with authors                                                                                                    | Methods/ Data extraction and Quality assessment/Discussion. We did not approach authors of studies with pain measured at follow up but not reported as proportions with degrees of pain. In recent reviews (Beswick et al. Lancet 2008, Beswick et al. Reviews in Clinical Gerontology 2010) we had additional data provided by under half of authors. Recent review by Mullan et al. 2009 suggests this is a common issue in reviews. This is considered in Discussion.<br><u>Authors of studies with appropriate data but with specific missing information were contacted by email.</u> |
| <b>Reporting of methods should include</b>                                                                                                 |                                                                                                                                                                                                                                                                                                                                                                                                                                                                                                                                                                                            |
| Description of relevance or appropriateness of studies assembled for assessing the hypothesis to be tested                                 | Results                                                                                                                                                                                                                                                                                                                                                                                                                                                                                                                                                                                    |
| Rationale for the selection and coding of data (eg, sound clinical principles or convenience)                                              | Results/ Data synthesis and analysis                                                                                                                                                                                                                                                                                                                                                                                                                                                                                                                                                       |
| Documentation of how data were classified and coded (eg, multiple raters, blinding, and interrater reliability)                            | Results/ Study selection/ Data extraction/ and Quality assessment                                                                                                                                                                                                                                                                                                                                                                                                                                                                                                                          |
| Assessment of confounding (eg, comparability of cases and controls in studies where appropriate)                                           | We identified only studies where populations were representative of the population receiving joint replacement                                                                                                                                                                                                                                                                                                                                                                                                                                                                             |
| Assessment of study quality, including blinding of quality assessors; stratification or regression on possible predictors of study results | To assess whether -studies were representative of the joint replacement population we assessed quality of studies based on: blind outcome assessment, incompleteness of outcome data collection, and other sources of bias (representativeness of study population). These are describe in Methods/ Study quality, Appendix 3, and throughout the Results section                                                                                                                                                                                                                          |
| Assessment of heterogeneity                                                                                                                | In Results/ Overview we have considered quality of studies as a source of heterogeneity. In Discussion paragraph 7                                                                                                                                                                                                                                                                                                                                                                                                                                                                         |

|                                                                                                                                                                                                                                                                              |                                                                                                                                                                                                                                                                                                             |
|------------------------------------------------------------------------------------------------------------------------------------------------------------------------------------------------------------------------------------------------------------------------------|-------------------------------------------------------------------------------------------------------------------------------------------------------------------------------------------------------------------------------------------------------------------------------------------------------------|
|                                                                                                                                                                                                                                                                              | we explain why the dataset is limited with regard to heterogeneity analyses.                                                                                                                                                                                                                                |
| Description of statistical methods (eg, complete description of fixed or random effects models, justification of whether the chosen models account for predictors of study results, dose-response models, or cumulative meta-analysis) in sufficient detail to be replicated | No analysis with combination was possible as described in Discussion paragraph 2.                                                                                                                                                                                                                           |
| Provision of appropriate tables and graphics                                                                                                                                                                                                                                 | Results summarised in Figure 2 and Table 1. Also Study flow diagram in Figure1, Search strategy in Appendix 2, Quality assessments in Appendix 3 and Pain outcomes in Appendix 4.                                                                                                                           |
| <b>Reporting of results should include</b>                                                                                                                                                                                                                                   |                                                                                                                                                                                                                                                                                                             |
| Graphic summarizing individual study estimates and overall estimate                                                                                                                                                                                                          | Figure 2 and Results section                                                                                                                                                                                                                                                                                |
| Table giving descriptive information for each study included                                                                                                                                                                                                                 | Table 1                                                                                                                                                                                                                                                                                                     |
| Results of sensitivity testing (eg, subgroup analysis)                                                                                                                                                                                                                       | Not possible due to range of outcome measures.                                                                                                                                                                                                                                                              |
| Indication of statistical uncertainty of findings                                                                                                                                                                                                                            | Discussed in detail in Results section and Discussion                                                                                                                                                                                                                                                       |
| <b>Reporting of discussion should include</b>                                                                                                                                                                                                                                |                                                                                                                                                                                                                                                                                                             |
| Quantitative assessment of bias (eg, publication bias)                                                                                                                                                                                                                       | Risk of bias table showing quality/ representativeness of studies included as Appendix 3. Considered extensively in Results sections: we used number of study centres and losses to follow up as markers of representativeness.                                                                             |
| Justification for exclusion (eg, exclusion of non-English-language citations)                                                                                                                                                                                                | No exclusions on the basis of language of publication.                                                                                                                                                                                                                                                      |
| Assessment of quality of included studies                                                                                                                                                                                                                                    | As described in Methods/ Quality assessment we used relevant issues from te Cochrane risk of bias table. Specifically these were: blind outcome assessment, incompleteness of outcome data collection, and representativeness of the study cohort. These are then applied in detail in the Results section. |
| <b>Reporting of conclusions should include</b>                                                                                                                                                                                                                               |                                                                                                                                                                                                                                                                                                             |
| Consideration of alternative explanations for observed results                                                                                                                                                                                                               | In the Introduction paragraph 5 and Discussion paragraph 11 we consider the possibility that patients lost to follow up have different pain outcomes than those followed up.                                                                                                                                |
| Generalisation of the conclusions (ie, appropriate for the data presented and within the domain of the literature review)                                                                                                                                                    | We think that reporting the proportion of people with a poor pain outcome across the studies is the best approach. A measured speculation on outcomes of                                                                                                                                                    |

|                                |                                                                                                               |
|--------------------------------|---------------------------------------------------------------------------------------------------------------|
|                                | those lost to follow up seems appropriate in Results/ Overview.                                               |
| Guidelines for future research | Discussion paragraph 12 and 13 discuss possible interventions based on determinants of good and bad outcomes. |
| Disclosure of funding source   | Funding described                                                                                             |
