# Supplementary material for: What proportion of patients report long-term pain after total hip or knee replacement for osteoarthritis? A systematic review of prospective studies in unselected patients
Source: PubMed Central journal article supplement — BMJ Open. 2012 Feb 22;2(1):e000435. doi: 10.1136/bmjopen-2011-000435 (PMC3289991; doi:10.1136/bmjopen-2011-000435), 2012-02-22
Supplement: bmjopen-2011-000435-s2.pdf [file bmjopen-2011-000435-s2.pdf]

## Appendix 2. MEDLINE search strategy

1. Arthroplasty, Replacement, Knee/ or Arthroplasty, Replacement, Hip/
2. exp Arthroplasty, Replacement, Hip/ or exp Hip Prosthesis/ or hip replacement.mp.
3. 1 or 2
4. exp Arthroplasty, Replacement, Knee/ or exp Knee Prosthesis/ or knee replacement.mp.
5. knee prosthesis.mp. or exp Knee Prosthesis/
6. 4 or 5
7. 6 or 3
8. hip prosthesis.mp. or exp Hip Prosthesis/
9. 8 or 7
10. total hip.tw.
11. total knee.tw.
12. 11 or 10 or 9
13. Orthopedic Procedures/ or orthopaedic surgery.mp.
14. 12 or 13
15. survey.mp. or exp Data Collection/
16. randomized controlled trial.mp. or exp Randomized Controlled Trials/
17. prospective study.mp. or exp Prospective Studies/
18. observational study.mp.
19. Comparative Study/
20. exp EPIDEMIOLOGY/ or epidemiology.mp.
21. longitudinal study.mp. or exp Longitudinal Studies/
22. case control study.mp. or exp Case-Control Studies/
23. evaluation study.mp. or exp Evaluation Studies/
24. follow up study.mp. or exp Follow-Up Studies/
25. 15 or 16 or 17 or 18 or 19 or 20 or 21 or 22 or 23 or 24
26. 25 and 14
27. osteoarthritis.mp. or Osteoarthritis, Hip/ or Osteoarthritis/ or Osteoarthritis, Knee/
28. 26 and 27
29. WOMAC.mp.
30. western ontario.mp.
31. american knee.mp.
32. aks.mp.
33. arthritis impact.mp.
34. oxford hip.mp.
35. oxford knee.mp.
36. hoos.mp.
37. koos.mp.
38. lequesne.mp.
39. self appraisal.mp.
40. vas.mp.
41. visual analogue.mp.
42. osteoarthritis outcome score.mp.
43. 29 or 30 or 31 or 32 or 33 or 34 or 35 or 36 or 37 or 38 or 39 or 40 or 41 or 42
44. 28 and 43
