# Supplementary material for: What proportion of patients report long-term pain after total hip or knee replacement for osteoarthritis? A systematic review of prospective studies in unselected patients
Source: PubMed Central journal article supplement — BMJ Open. 2012 Feb 22;2(1):e000435. doi: 10.1136/bmjopen-2011-000435 (PMC3289991; doi:10.1136/bmjopen-2011-000435), 2012-02-22
Supplement: bmjopen-2011-000435-s3.pdf [file bmjopen-2011-000435-s3.pdf]

## Appendix 43. Unfavourable pain outcome reported in included studies

| <b>Hip replacement</b>     |                                                                                                     |                                                                                                                                                                               |
|----------------------------|-----------------------------------------------------------------------------------------------------|-------------------------------------------------------------------------------------------------------------------------------------------------------------------------------|
| Nikolajson et al. 2006[23] | Authors' own scale of presence of hip pain and impact on daily life                                 | Pain with moderate, severe or very severe impact on daily life                                                                                                                |
| Jones et al. 2000[24]      | WOMAC pain                                                                                          | Moderate/ severe pain defined as a gain of less than 10 points on the 100 point WOMAC pain dimension (representing a gain of at least 60% of the baseline standard deviation) |
| Quintana et al. 2006[30]   | WOMAC pain                                                                                          | Patients reporting no improvement in pain greater than minimal clinical important difference 24.55/100                                                                        |
| Nilsdotter et al. 2003[26] | WOMAC pain                                                                                          | Pain improved by less than 10/ 100 units reflecting no detectable clinical improvement                                                                                        |
| Singh & Lewallen 2010[27]  | Single question: How much pain do you have in your operated hip?<br>None, mild, moderate or severe. | Moderate or severe pain                                                                                                                                                       |
| Wylde et al. 2011[28]      | WOMAC pain                                                                                          | Moderate or severe persistent pain for 3 months in replaced hip, WOMAC 0–75/100                                                                                               |
| <b>Knee replacement</b>    |                                                                                                     |                                                                                                                                                                               |
| Baker et al. 2007[31]      | Oxford knee score pain dimension                                                                    | Persistent knee pain                                                                                                                                                          |
| Jones et al. 2000[24]      | WOMAC pain                                                                                          | Moderate/ severe pain defined as an improvement of less than 10 points on the WOMAC pain dimension                                                                            |
| Quintana et al. 2006[30]   | WOMAC pain                                                                                          | Patients reporting no improvement in pain greater than minimal clinical important difference 24.55/100                                                                        |

|                               |                                            |                                                                                    |
|-------------------------------|--------------------------------------------|------------------------------------------------------------------------------------|
|                               |                                            | difference 22.6/100                                                                |
| Núñez et al.<br>2007[35]      | WOMAC pain                                 | No improvement in postoperative pain scores                                        |
| Stephens 2002[34]             | WOMAC                                      | No change or increase in pain                                                      |
| Lundblad et al.<br>2008[37]   | VAS pain                                   | Pain at rest and movement                                                          |
| Nilsdotter et al.<br>2009[36] | KOOS pain compared<br>with pre-operatively | Similar or more pain than pre-operatively                                          |
| Vuorenmaa<br>2008[38]         | VAS pain                                   | Moderate or severe pain                                                            |
| Czurda et al.<br>2010[32]     | WOMAC pain                                 | Painful knees – moderate or worse response in<br>any WOMAC pain dimension          |
| Wylde et al.<br>2011[28]      | WOMAC pain                                 | Moderate or severe persistent pain for 3<br>months in replaced hip, WOMAC 0–75/100 |
| Brander et al.<br>2003[33]    | VAS pain                                   | Significant pain, VAS score >40                                                    |
