# Supplementary material for: What proportion of patients report long-term pain after total hip or knee replacement for osteoarthritis? A systematic review of prospective studies in unselected patients
Source: PubMed Central journal article supplement — BMJ Open. 2012 Feb 22;2(1):e000435. doi: 10.1136/bmjopen-2011-000435 (PMC3289991; doi:10.1136/bmjopen-2011-000435), 2012-02-22
Supplement: bmjopen-2011-000435-s4.pdf [file bmjopen-2011-000435-s4.pdf]

## Appendix 34. Risk of bias (Quality of studies: representativeness)

| Study                      | Cohort representativeness                                                                                                                       | Exclusions                                                                                                                                                                                                                      | Comparability of cohort<br>Age (SD), % female, indication                                                                    | Outcome assessment<br>Follow up                    |
|----------------------------|-------------------------------------------------------------------------------------------------------------------------------------------------|---------------------------------------------------------------------------------------------------------------------------------------------------------------------------------------------------------------------------------|------------------------------------------------------------------------------------------------------------------------------|----------------------------------------------------|
| <b>Hip replacement</b>     |                                                                                                                                                 |                                                                                                                                                                                                                                 |                                                                                                                              |                                                    |
| <b>Registry</b>            |                                                                                                                                                 |                                                                                                                                                                                                                                 |                                                                                                                              |                                                    |
| Nikolajson et al. 2006[23] | Consecutive patients identified in a national joint registry with 94% of hip replacements recorded. 93.6% response rate to postal questionnaire | Not degenerative hip arthritis<br>Not age 18-90 years<br>Not postero-lateral surgical approach<br>No pre-operative registration of pain<br>Previous or subsequent ipsilateral or contralateral hip operations                   | 71.6 (8.7)<br>% female not reported<br>100% degenerative hip arthritis, operation through a posterolateral surgical approach | Self-completed<br>5.9% lost to follow up           |
| <b>Multiple centres</b>    |                                                                                                                                                 |                                                                                                                                                                                                                                 |                                                                                                                              |                                                    |
| Jones et al. 2000[24]      | Approximately 81% of consecutive patients listed for and who subsequently received joint replacement in health region.                          | On health region waiting list for less than 7 days<br>Non-elective<br>Hemiarthroplasties, revisions and emergency surgery<br>Not resident in health region<br>Age <40 years<br>Non-English speaking<br>Living in long-term care | 68.2 (11.1)<br>60%<br>94% OA                                                                                                 | Self-completed<br>5.8% lost to follow up or died   |
| Quintana et al. 2006[30]   | Consecutive patients scheduled to undergo total hip replacement in 7 teaching hospitals. 82.4% response                                         | Not on waiting list for THR<br>Severe comorbidities, such as cancer, terminal disease, or psychiatric conditions<br>Main diagnosis not hip OA                                                                                   | 69.1<br>48.3%<br>100% OA                                                                                                     | Self-completed (postal)<br>25.5% lost to follow up |
| <b>Single centre</b>       |                                                                                                                                                 |                                                                                                                                                                                                                                 |                                                                                                                              |                                                    |
| Nilsdotter et al. 2003[26] | Consecutive patients at single department of orthopaedics                                                                                       | Not primary unilateral THR<br>Not primary OA                                                                                                                                                                                    | 71 (range 50-92)<br>55%<br>100% OA                                                                                           | Self-completed<br>5.9% lost to follow up           |

|                           |                                                                                                                                 |                                                                                                                                                                                                                                 |                                                |                                                                                                                            |
|---------------------------|---------------------------------------------------------------------------------------------------------------------------------|---------------------------------------------------------------------------------------------------------------------------------------------------------------------------------------------------------------------------------|------------------------------------------------|----------------------------------------------------------------------------------------------------------------------------|
| Singh & Lewallen 2010[27] | Consecutive patients from single centre joint registry sent postal questionnaire or completed at outpatient clinic or telephone | Not alive at follow up<br>Not primary THA                                                                                                                                                                                       | 65.0 (13.3)<br>51%<br>87% OA                   | Self-completed (postal or in clinic) or administered on telephone by experienced registry staff<br>37.7% lost to follow up |
| Wylde et al. 2011[28]     | Consecutive patients on an orthopaedic centre database                                                                          | Not primary THR                                                                                                                                                                                                                 | Median 73 range 65-78)<br>63%<br>Majority OA   | Self-completed postal questionnaire<br>47.6% lost to follow up                                                             |
| <b>Knee replacement</b>   |                                                                                                                                 |                                                                                                                                                                                                                                 |                                                |                                                                                                                            |
| <b>Registry</b>           |                                                                                                                                 |                                                                                                                                                                                                                                 |                                                |                                                                                                                            |
| Baker et al. 2007[31]     | Random sample of patients in national joint registry                                                                            | Not primary unilateral TKR<br>No contact details recorded<br>Known to have died                                                                                                                                                 | 70.7 (range 25-98)<br>57% (estimate)<br>96% OA | Self-completed postal questionnaire<br>14.9% lost to follow up                                                             |
| <b>Multiple centres</b>   |                                                                                                                                 |                                                                                                                                                                                                                                 |                                                |                                                                                                                            |
| Jones et al. 2000[24]     | Approximately 81% of consecutive patients listed for and who subsequently received joint replacement in health region.          | On health region waiting list for less than 7 days<br>Non-elective<br>Hemiarthroplasties, revisions and emergency surgery<br>Not resident in health region<br>Age <40 years<br>Non-English speaking<br>Living in long-term care | 69.2 (9.2)<br>59%<br>94% OA                    | Self-completed<br>5.8% lost to follow up or died                                                                           |
| Quintana et al. 2006[30]  | Consecutive patients scheduled to undergo total knee replacement in 7 teaching hospitals. 83.4% response                        | Not on waiting list for TKR<br>Severe comorbidities, such as cancer, terminal disease, or psychiatric conditions<br>Main diagnosis not knee OA                                                                                  | 71.9<br>73%<br>100% OA                         | Self-completed (postal)<br>24.1% lost to follow up                                                                         |
| <b>Single centre</b>      |                                                                                                                                 |                                                                                                                                                                                                                                 |                                                |                                                                                                                            |

|                          |                                                                                               |                                                                                                                                                                                                                                                                                |                                                      |                                                                                      |
|--------------------------|-----------------------------------------------------------------------------------------------|--------------------------------------------------------------------------------------------------------------------------------------------------------------------------------------------------------------------------------------------------------------------------------|------------------------------------------------------|--------------------------------------------------------------------------------------|
| Núñez et al. 2007[35]    | Consecutive patients at a single tertiary care centre                                         | Not OA grade IV Kellgren and Lawrence criteria grade 4<br>Did not agree to participate and give informed consent (2 out of 90)<br>Functional illiteracy or severe psychopathology                                                                                              | 74.8 (5.6)<br>81%<br>100% OA                         | Self-completed at clinic<br>5.0% lost to follow up                                   |
| Stephens 2002[34]        | Patients referred for and receiving TKR                                                       | Age <50 years<br>Significant cognitive impairment (Telephone Interview for Cognitive Status)                                                                                                                                                                                   | 67.4 (8.1) followed up<br>54% followed up<br>100% OA | Self-completed (postal)<br>7.4% lost to follow up                                    |
| Lundblad et al. 2008[37] | Patients scheduled for TKR at a single hospital                                               | No consent<br>Not Caucasian<br>Not scheduled for TKR for OA                                                                                                                                                                                                                    | 68 (range 40-80)<br>50.7%<br>100% OA                 | Self-completed postal<br>10.1% lost to follow up                                     |
| Nilsson et al. 2009[36]  | Patients on waiting list for knee replacement at a single hospital department of orthopaedics | Not primary TKR<br>Not knee OA                                                                                                                                                                                                                                                 | 71 (8)<br>61.8%<br>100% OA                           | Self-completed postal<br>12.7% lost to follow up                                     |
| Vuorenmaa 2008[38]       | Patients referred for and receiving TKR at a single hospital                                  | Age >80 years<br>Knee OA rating not 3–4 by Ahlbäck classification<br>Inflammatory joint disease<br>Early TKR<br>Medical diagnosis of serious disease                                                                                                                           | 70 (5)<br>86%<br>100% OA                             | Self completed VAS pain score at clinic<br>11.8% lost to follow up                   |
| Czurda et al. 2010[32]   | Consecutive patients at single centre                                                         | Not primary TKR<br>Not degenerative OA<br>Rheumatoid arthritis, post-operative infection and/or if the pain they suffered from at the time of follow-up appeared after falling or another traumatic experience<br>Not performed by experienced surgeon<br><18 months follow up | 75-76 (range 45-96)<br>76%<br>100% OA                | Telephone interview with patient-reported outcome measure<br>13.4% lost to follow up |
| Wylde et al. 2011[28]    | Consecutive patients on an orthopaedic centre                                                 | Not primary TKR                                                                                                                                                                                                                                                                | Median 73 (range 28-96)                              | Self-completed postal questionnaire                                                  |

|                            |                                                                       |                                                                                                                                                                                                                                                                                             |                              |                                                         |
|----------------------------|-----------------------------------------------------------------------|---------------------------------------------------------------------------------------------------------------------------------------------------------------------------------------------------------------------------------------------------------------------------------------------|------------------------------|---------------------------------------------------------|
| database                   |                                                                       |                                                                                                                                                                                                                                                                                             | 59%<br>Majority OA           | 45.3% lost to follow<br>up                              |
| <i>Single surgeon</i>      |                                                                       |                                                                                                                                                                                                                                                                                             |                              |                                                         |
| Brander et al.<br>2003[33] | Consecutive patients<br>treated by single<br>surgeon at single centre | Not degenerative arthritis<br>Not intact cognitive abilities<br>Younger than 18 years<br>Depression or treatment with antidepressant or<br>anxiolytic<br>Concurrent musculoskeletal diagnosis (fibromyalgia,<br>spinal stenosis, significant ipsilateral hip OA)<br>No signed consent form. | 66 (10.5)<br>55.2%<br>94% OA | Self-completed<br>questionnaire<br>0% lost to follow up |

THR total hip replacement, TKR total knee replacement, OA osteoarthritis, WOMAC Western Ontario and McMaster Universities Arthritis Index, VAS visual analogue scale, KOOS Knee Osteoarthritis Outcome Score
