# Supplementary material for: What proportion of patients report long-term pain after total hip or knee replacement for osteoarthritis? A systematic review of prospective studies in unselected patients
Source: PubMed Central journal article supplement — BMJ Open. 2012 Feb 22;2(1):e000435. doi: 10.1136/bmjopen-2011-000435 (PMC3289991; doi:10.1136/bmjopen-2011-000435), 2012-02-22
Supplement: bmjopen-2011-000435.draft_revisions.pdf [file bmjopen-2011-000435.draft_revisions.pdf]

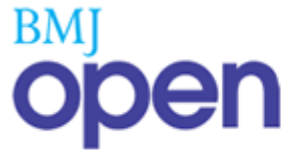

**What proportion of patients report long-term pain after total hip or knee replacement for osteoarthritis? A systematic review of prospective studies in unselected patients**

|                                 |                                                                                                                                                                                                                                                                                                                                                                        |
|---------------------------------|------------------------------------------------------------------------------------------------------------------------------------------------------------------------------------------------------------------------------------------------------------------------------------------------------------------------------------------------------------------------|
| Journal:                        | <i>BMJ Open</i>                                                                                                                                                                                                                                                                                                                                                        |
| Manuscript ID:                  | bmjopen-2011-000435                                                                                                                                                                                                                                                                                                                                                    |
| Article Type:                   | Research                                                                                                                                                                                                                                                                                                                                                               |
| Date Submitted by the Author:   | 07-Oct-2011                                                                                                                                                                                                                                                                                                                                                            |
| Complete List of Authors:       | Beswick, Andrew; University of Bristol, School of Clinical Sciences<br>Wylde, Vikki; University of Bristol, School of Clinical Sciences<br>Goberman-Hill, Rachael; University of Bristol, School of Clinical Sciences<br>Blom, Ashley; University of Bristol, School of Clinical Sciences<br>Dieppe, Paul; Peninsula Medical School, Clinical Education Research Group |
| <b>Primary Subject Heading</b>: | Surgery                                                                                                                                                                                                                                                                                                                                                                |
| Secondary Subject Heading:      | Rehabilitation medicine                                                                                                                                                                                                                                                                                                                                                |
| Keywords:                       | Hip < ORTHOPAEDIC & TRAUMA SURGERY, Knee < ORTHOPAEDIC & TRAUMA SURGERY, Orthopaedic & trauma surgery < SURGERY                                                                                                                                                                                                                                                        |
|                                 |                                                                                                                                                                                                                                                                                                                                                                        |

SCHOLARONE™  
Manuscripts

1  
2  
3 **What proportion of patients report long-term pain after total hip or knee replacement**  
4 **for osteoarthritis? A systematic review of prospective studies in unselected patients**  
5  
6

7 **Article summary**  
8

9 *Article focus*  
10

- 11 • Total hip and knee replacement have good clinical outcomes.
- 12 • There is a perception that some people experience long-term pain after their joint  
13 replacement.
- 14 • We aim to establish the proportion of patients experiencing long-term pain after joint  
15 replacement.
- 16 • We aim to establish the proportion of patients experiencing long-term pain after joint  
17 replacement.
- 18 • We aim to establish the proportion of patients experiencing long-term pain after joint  
19 replacement.
- 20 • We aim to establish the proportion of patients experiencing long-term pain after joint  
21 replacement.

22 *Key messages*  
23

- 24 • Well conducted studies suggest that a significant proportion of people continue to  
25 have painful joints after surgery.
- 26 • The proportion of people with an unfavourable long-term pain outcome was about 7  
27 to 23% after hip, and 10 to 34% after knee replacement.
- 28 • There is an urgent need to improve general awareness that some patients experience  
29 long-term pain after joint replacement, and to address the determinants of good and  
30 bad outcomes.
- 31 • There is an urgent need to improve general awareness that some patients experience  
32 long-term pain after joint replacement, and to address the determinants of good and  
33 bad outcomes.
- 34 • There is an urgent need to improve general awareness that some patients experience  
35 long-term pain after joint replacement, and to address the determinants of good and  
36 bad outcomes.
- 37 • There is an urgent need to improve general awareness that some patients experience  
38 long-term pain after joint replacement, and to address the determinants of good and  
39 bad outcomes.

40 *Strengths and limitations of this study*  
41

- 42 • Systematic review conducted according to established methods and guidelines  
43 identified 17 good quality studies
- 44 • Pain outcome data is widely recorded as mean values but only a minority of studies  
45 reported outcomes as proportions with pain at follow up.
- 46 • The small number of studies and different pain outcome measures precluded meta-  
47 analysis, calculation of a summary estimate, and exploration of sources of  
48 heterogeneity.
- 49 • The small number of studies and different pain outcome measures precluded meta-  
50 analysis, calculation of a summary estimate, and exploration of sources of  
51 heterogeneity.
- 52 • The small number of studies and different pain outcome measures precluded meta-  
53 analysis, calculation of a summary estimate, and exploration of sources of  
54 heterogeneity.

55 **Abstract**  
56

57 *Objective*  
58

59 To estimate the proportion of people reporting long-term moderate or severe pain after total  
60 hip or knee replacement for the treatment of osteoarthritis.

## *Design*

Systematic review.

## *Data sources*

MEDLINE and EMBASE databases were searched from inception to January 2011. Citations of key articles in ISI Web of Science, and reference lists were checked. No language restrictions were applied at any stage of the review.

## *Selection criteria*

Two authors screened titles and abstracts for potential eligibility. Studies included were prospective studies of consecutive or generally unselected osteoarthritis patients with total hip or knee replacement followed for 3 months to 5 years that reported a patient-centred pain outcome.

One author extracted data and this was checked independently against original articles by a second. We summarised the proportions of people with different severities of pain in the operated hip or knee.

## *Results*

Searches identified 1308 articles of which 115 reported patient-centred pain outcomes in representative populations followed for 3 months to 5 years. Fourteen articles describing 17 cohorts (6 in hip and 11 in knee patients) presented appropriate data. A range of about 7 to 23% of hip and 10 to 34% of knee replacement patients had unfavourable pain outcomes but these may be underestimates owing to incomplete follow up.

## *Conclusion*

For many people, total hip or knee replacement is an effective treatment for pain caused by osteoarthritis. However a significant proportion of people have painful joints after surgery. There is an urgent need to improve general awareness of this possibility and to address the determinants of good and bad outcomes.

## Introduction

Symptoms of osteoarthritis are managed in the community but if pharmacological and conservative treatments provide inadequate relief then total joint replacement is commonly performed. In England and Wales during the year ending March 2010 there were 71,021 primary total hip and 79,263 primary total knee replacement operations recorded in the National Joint Registry.[1] In the USA in 2006, the estimated numbers of hospital discharges after total hip or knee replacement procedures were 231,000 and 542,000 respectively,[2] with demand predicted to increase substantially.[3]

Total hip or knee replacement is highly successful when judged by prosthesis related outcomes, such as the radiographic appearance of the prosthesis,[4] implant survival,[5] or surgeon assessed outcome.[6] Nevertheless, many people continue to experience significant pain and functional problems after total joint replacement,[7, 8] and patient-reported pain is now widely assessed using disease-specific outcome measures. In the USA, the importance of patient-reported outcomes in assessing quality of care is recognised,[9] and in England, following the report of Lord Darzi,[10] information is routinely collected after elective surgery.[11]

Reporting of pain outcomes in the orthopaedic literature frequently emphasises improvement in mean scores. However, to advise both patients and their healthcare professionals, it is important to have a clear understanding of the frequency and extent of pain following total hip or knee replacement. In the absence of appropriate clinical trials, the best way to explore this is the prospective study of unselected patients.

We have used systematic review methods to identify studies reporting the proportion of people with significant long-term pain after total hip or knee replacement. We aimed to identify studies in populations representative of contemporary clinical practice. Some information on all patients in cohorts is required as patients lost to follow up may have experienced poorer or at least similar outcomes to those followed up.[12-15]

## Methods

We used systematic review methods based on those described in the Cochrane handbook of systematic reviews,[16] and in accordance with the MOOSE proposal for reporting systematic reviews and meta-analyses of observational studies.[17] A MOOSE checklist is shown in Appendix 1.

## *Data sources and searches*

1  
2  
3 MEDLINE and EMBASE databases were searched from inception to January 31<sup>st</sup> 2011. A  
4 general search was performed to identify quantitative research in primary total hip or knee  
5 replacement. The MEDLINE search strategy is shown in Appendix 2. Search terms related  
6 to: hip or knee replacement; and studies with an epidemiological design including prospective  
7 and longitudinal studies. No language restrictions were applied.  
8  
9

10  
11  
12 Within titles, abstracts and keywords of articles identified, we searched for text words  
13 relating to osteoarthritis and *disease specific patient-centred pain outcome measures* used in  
14 osteoarthritis and joint replacement. Specifically these were: Western Ontario (WOMAC),  
15 Arthritis Impact (AIMS), Lequesne, Oxford hip or Oxford knee score, Hip Osteoarthritis  
16 Outcome Score (HOOS) or Knee Osteoarthritis Outcome Score (KOOS), pain visual  
17 analogue scales (VAS), and self appraisal. Outcomes not considered patient-centred were  
18 Knee Society, Harris Hip, American Knee Society, and Bristol Knee Scores. We did not  
19 include generic health measures including the Health Assessment Questionnaire (HAQ),  
20 EuroQol, London Handicap Scale (LHS), Medical Outcomes Study Short Form-36 (SF-36),  
21 Disease Repercussion Profile (DRP), Sickness Impact Profile, and WHOQol-BREF.  
22  
23

24  
25 We also checked citations of key articles in ISI Web of Science and reference lists. Studies  
26 reported only as abstracts were excluded. References were managed in an Endnote X3  
27 database.  
28  
29

### 30 31 32 **Study selection**

33  
34 We included prospective studies of consecutive or generally unselected patients with primary  
35 total hip or knee replacement. Studies reporting a specific implant or component were eligible  
36 if the population studied was not clearly selected, i.e. the group was likely to be  
37 representative of the total joint replacement population. We limited follow up to between 3  
38 months and 5 years. In evaluating the effectiveness of primary total hip or knee replacement  
39 in reducing pain from osteoarthritis we are concerned with outcomes when recovery can be  
40 considered maximal and not later issues of joint loosening and revision.  
41  
42

43  
44 Study titles, abstracts and, where necessary, full articles were checked for eligibility by  
45 researchers experienced in systematic reviews (ADB) and rheumatology (PD). Disagreements  
46 were resolved by discussion. Validity of the database was confirmed by checking against  
47 reference lists provided by local experienced researchers in orthopaedic outcomes.  
48  
49

50  
51 While we recognise that studies may include patients with other joint replacement surgery,  
52 we excluded studies specifically describing outcomes of revision operations and partial joint  
53  
54  
55  
56  
57  
58  
59  
60

1  
2  
3  
4  
5  
6  
7  
8  
9  
10  
11  
12  
13  
14  
15  
16  
17  
18  
19  
20  
21  
22  
23  
24  
25  
26  
27  
28  
29  
30  
31  
32  
33  
34  
35  
36  
37  
38  
39  
40  
41  
42  
43  
44  
45  
46  
47  
48  
49  
50  
51  
52  
53  
54  
55  
56  
57  
58  
59  
60

replacements (e.g. unicompartmental or patellofemoral knee replacement, and hip resurfacing).

Studies in selected patients were excluded: cross-sectional and retrospective studies with no information on patients not followed up; randomised controlled trials; and evaluations of specific technologies. Randomised controlled trials and many evaluations of new technologies comprise selected populations and furthermore it is outside the scope of this review to assess whether these reflect best clinical practice.

### ***Data extraction***

The pain measure relating to the operated hip or knee was considered in the review. No attempt was made to contact authors of studies that did not have appropriate data. In previous reviews we have conducted only a minority of authors contacted have provided additional data for analyses. Discouragement towards contact with study authors arising from previous poor response rates was noted in a survey of review authors.[18]

Data from eligible articles was recorded on an Excel spreadsheet by one reviewer (ADB) and checked against original articles by a second (VW). Data was extracted on: indication (all or majority of patients with osteoarthritis), pain outcome, baseline dates, country, study design, how group selected, age, number of patients recruited, number who died and the number lost to follow up. We recorded the number of people at follow up with no pain or mild pain, moderate or severe pain (or with little improvement in pain from pre-operative), revision or dislocations or deep infection, and contralateral or other joint replacement or treatment for fracture.

### ***Data synthesis and analysis***

As studies reported different pain measures, we summarised pain outcomes in a way that was applicable to all measures. The proportions of people with different severities of pain were summarised as 'favourable', 'unfavourable' or 'uncertain' outcomes. Favourable outcome includes people with no pain or mild pain at follow up, while unfavourable outcome includes those with moderate to severe pain or for whom surgery had not relieved pain. The uncertain outcome includes all patients for whom we cannot be sure of their pain levels at follow up. These include patients who died, had revision surgery, contra-lateral surgery or dislocation and were not followed up, and those lost to follow up. We also included as uncertain those patients with a degree of reported pain which we could not classify as a favourable or unfavourable outcome.

### *Quality assessment*

Only studies with unselected patients and complete reporting of losses to follow up were included and no further judgement on study quality was considered.

### **Results**

The review process is summarised in Figure 1. Searches identified 1308 studies reporting patient-centred outcomes in patients with osteoarthritis. Of these, 115 studies included data on patient-centred pain outcomes in representative population samples studied prospectively for between 3 months and 5 years. Fourteen articles describing 17 cohorts (6 in hip and 11 in knee patients) presented results classifiable as proportions of people with different extents of pain at follow up. The main reasons for exclusion at this stage were lack of a pain outcome separate from an overall outcome score or the presentation of results as means only.

Patient and study characteristics and outcomes are shown in Table 1. The proportions of people with different pain outcomes are summarised in Figure 2.

### **Total hip replacement**

Systematic searches identified six studies from Canada, Denmark, Spain, Sweden, UK and USA including a total of 13,031 patients. Pain outcome measures were based on the WOMAC pain scale or authors' own methods.

### *WOMAC pain*

Jones and colleagues followed up a cohort of 242 consecutive total hip replacement patients six months after total hip replacement.[19] Patients undergoing hemiarthroplasty, revisions and emergency surgery were excluded. Results were presented combined with a total knee replacement cohort and we assumed that equal proportions of hip and knee patients were followed up. The WOMAC outcome used to define a poor pain outcome was a gain of less than 10 points on the 100 point scale. We estimate the proportion of patients with no detectable clinical improvement was 8.3% (uncertain 5.8%).

Several reports described the cohort of Nilsson and colleagues. The prospective study with 219 consecutive patients with primary unilateral THR represented the most complete report. [20] Of the 219 patients, only those recruited in the later stages of the study had baseline pain assessed with the WOMAC questionnaire. Thus the detectable clinical improvement outcome of 10 points on the 100 point scale was available on 92 patients. We estimated overall numbers of patients with favourable and unfavourable outcomes on the basis of these 92

1  
2  
3 patients. Approximately 20.5% of patients had no detectable clinical improvement after a  
4 mean of 43 months (uncertain 9.6%).  
5  
6

7 Quintana and colleagues followed up a cohort of 784 patients on a waiting list for total hip  
8 replacement.[21] WOMAC questionnaires were completed 6 months after surgery by 584  
9 patients. The authors identified 24.55 points on the 100 point WOMAC scale as representing  
10 a minimal clinically important difference. No improvement in pain greater than the minimal  
11 clinically important difference was observed in 16.3% of patients (uncertain 25.5%).  
12  
13

14 In the study of Wylde and colleagues, 1401 consecutive patients with total hip replacement  
15 were followed prospectively for a median of 41 months.[22] In a postal survey moderate or  
16 severe persistent pain, indicated by a WOMAC score of 0–75 points on the 100 point scale,  
17 lasting 3 months or more, was reported by 8.1% of patients (uncertain 52.7%).  
18  
19

### 20 *Authors own pain measure*

21 In the study of Nikolajson et al., 1231 patients with primary total hip replacement were  
22 followed up by postal questionnaire at 12–18 months.[23] Pain with moderate to very severe  
23 impact on daily life was reported by 10.3% of patients (uncertain 28.4%).  
24  
25

26 Singh and Lewallen followed up a joint registry population with a postal questionnaire. [24]  
27 Of 9154 patients with total hip replacement, 5707 provided information at 24 months.  
28 Moderate or severe pain in the operated hip was reported by 4.8% of patients (uncertain  
29 37.7%).  
30  
31

### 32 **Total knee replacement**

33 Searches identified eleven studies conducted in Canada, Finland, Spain, Sweden, UK and  
34 USA reporting appropriate pain outcomes after total knee replacement. Studies included a  
35 total of 12,800 patients.  
36  
37

### 38 *WOMAC pain*

39 In addition to their study in hip replacement patients, Jones and colleagues followed up a  
40 cohort of 292 consecutive patients 6 months after total knee replacement.[19] Patients  
41 receiving hemiarthroplasty, revisions and emergency surgery were excluded. Assuming equal  
42 proportions followed up we estimate that a detectable clinical improvement of less than  
43 10/100 points on the WOMAC pain scale was reported by 18.5% (uncertain 5.5%).  
44  
45

46 Quintana and colleagues followed up 792 consecutive patients after total knee  
47 replacement.[21] At 6 month follow up, WOMAC questionnaires were completed by 601  
48  
49  
50  
51  
52  
53  
54  
55  
56  
57  
58  
59  
60



1  
2  
3 patients. No improvement in pain greater than the minimal clinically important difference  
4 (22.6/100) was observed in 25.1% of patients (uncertain 24.1%).  
5  
6

7  
8 A cohort of 1394 consecutive total knee replacement patients were followed up prospectively  
9 by Wylde and colleagues for a median of 28 months.[22] In a postal survey, moderate or  
10 severe persistent pain, indicated by a WOMAC score of 0–75 points on the 100 point scale,  
11 lasting 3 months or more was reported by 14.3% of patients (uncertain 54.7%).  
12  
13

14  
15 After total knee replacement surgery, a cohort of 68 patients was followed up prospectively  
16 by Stephens and colleagues.[25] At six months, 16.2% of patients (uncertain 7.4%) had no  
17 change or increased WOMAC pain compared with before surgery.  
18  
19

20  
21 Núñez and colleagues followed up a group of 88 consecutive primary total knee replacement  
22 patients.[26] At 36 months, 8.0% of patients (uncertain 23.9%) had no improvement in  
23 WOMAC pain scores.  
24  
25

26  
27 Czurda and colleagues followed up 411 consecutive patients after computer-assisted or  
28 conventional primary knee replacement at a mean of 26 months.[27] Painful knees, defined  
29 as moderate pain or worse in any of the WOMAC pain questions, were reported by 13.9% of  
30 patients (uncertain 19.7%).  
31  
32

### 33 34 ***KOOS pain***

35  
36 From a postal survey of patients waiting for primary total knee replacement, Nilsson and  
37 colleagues followed 102 patients prospectively.[28] At 60 months, 26.5% of patients  
38 (uncertain 27.5%) experienced similar or more pain than before surgery.  
39  
40

### 41 42 ***Oxford knee score pain dimension***

43  
44 Baker and colleagues followed up 9417 patients with primary total hip replacement from a  
45 joint registry by postal questionnaire at least 12 months after surgery.[29] Persistent knee  
46 pain was reported by 16.8% of patients (uncertain 14.9%).  
47  
48

### 49 50 51 ***VAS pain***

52  
53 In the study of Brander and colleagues, 116 consecutive patients with primary total knee  
54 replacement were followed prospectively for up to 12 months.[30] Using a VAS scale, the  
55 authors identified significant knee pain (defined as a VAS score of >40) in 12.9% of patients  
56 (uncertain 2.6%).  
57  
58  
59  
60

1  
2  
3 Lundblad and colleagues followed up 69 total knee replacement patients for 18 months.[31]  
4  
5 Interpreting VAS responses, the authors reported pain at rest and on movement in 21.7% of  
6  
7 patients (uncertain 47.8%).  
8

9 Vuorenmaa and colleagues followed up 51 total knee replacement patients prospectively at 3  
10  
11 months.[32] Moderate or severe pain, defined as >30 on a 100mm VAS pain scale, was  
12  
13 reported in 17.6% of patients (15.7%).  
14

## 15 Overview

16  
17 Overall, an unfavourable pain outcome was seen in at least 4.8% and up to 20.5% of patients  
18  
19 after hip replacement (Figure 2). However these are likely to be underestimates as we do not  
20  
21 have information on the outcomes in between 5.8 and 52.7% of patients. Even considering  
22  
23 studies with some degree of outcome consistency involving minimal clinically important  
24  
25 differences the range of unfavourable pain outcome was wide with at least 8.1% and up to  
26  
27 20.5% of patients affected. With the conservative assumption that an equal proportion of  
28  
29 patients with missing data had an unfavourable pain outcome, we estimate that about 7 to  
30  
31 23% of patients experienced long-term pain after hip replacement.

32 After knee replacement, an unfavourable pain outcome was seen in at least 8.0% and up to  
33  
34 26.5% of patients (Figure 2). Considering studies with some degree of outcome consistency  
35  
36 the range of unfavourable pain outcome was wide with at least 14.3% and up to 25.1% of  
37  
38 patients affected. Again these are likely to be underestimates as we do not have outcome  
39  
40 information on between 2.6 and 54.7% of patients. Assuming the patients with missing data  
41  
42 had similar pain outcomes, we estimate that about 10 to 34% of patients experience long-term  
43  
44 pain after knee replacement.

## 45 Discussion

46  
47 These data show that many people with a total hip or knee replacement complain of pain in  
48  
49 the operated joint in the early years after surgery. This was particularly evident after total  
50  
51 knee replacement.  
52

53 Although we have interpreted pain outcomes as favourable, unfavourable or uncertain we do  
54  
55 not believe the data justify combination to provide summary values. In the studies identified  
56  
57 in our review, several different outcome measures were reported, and in studies with similar  
58  
59 outcomes different methods of analysis were used. Without specific information on  
60  
responsiveness and correlation between methods, an important additional source of  
heterogeneity may be introduced.[33]

1  
2  
3 Previous reviews have looked at functional and health-related quality of life after joint  
4 replacement. Kane and colleagues reported functional outcomes after total knee replacement  
5 in a literature review of 62 studies published between 1995 and 2003. [34] They concluded  
6 that knee replacement leads to improved function as shown by large effect sizes in studies,  
7 but that larger benefits were perceived by physicians than experienced by patients. Ethgen  
8 and colleagues identified 74 prospective cohort studies published between 1980 and 2003 that  
9 included quality of life outcomes.[35] The authors highlighted the value of health related  
10 quality of life data in improving management of patients undergoing hip or knee replacement.  
11 They concluded that total hip and knee arthroplasties were “quite effective” in improving  
12 health related quality of life dimensions. In a large European cohort, Judge and colleagues  
13 concluded that 14–36% of patients had no symptomatic improvement 12 months after total  
14 hip replacement.[8]

15  
16 The results we present are consistent with those reporting satisfaction as an outcome. For  
17 example Bourne et al. reported satisfaction with pain relief in a study in knee replacement  
18 patients.[36] Satisfaction with pain relief ranged from 72% for going up or down stairs to  
19 85% for walking on a flat surface.

20  
21 In systematic reviews, publication bias is important in assessing the validity of the results. In  
22 this review we identified 95 studies where the proportion of people with pain at follow up  
23 could have been estimated by authors with access to original data. In previous reviews that  
24 we have conducted, replies to requests for additional data have been patchy and we chose not  
25 to pursue this approach. Nevertheless, we encourage study authors to perform and publish  
26 appropriate analyses of their data. Similarly, a wealth of patient-centred outcome data is now  
27 collected routinely and merits wide dissemination.

28  
29 The majority of studies included in our review reported outcomes of patients after total joint  
30 replacement. A few studies followed up patients listed for total joint replacement and it is  
31 possible that these studies included patients who subsequently received other surgical  
32 treatments including unicompartmental knee replacement or hip resurfacing.

33  
34 In this review we were unable to apply a standard definition of pain severity at follow up. In  
35 the articles we included there were several interpretations of pain as an unfavourable  
36 outcome. These included: lack of improvement in postoperative pain scores, pain at rest,  
37 persistent pain, night pain, and lack of detectable clinical improvement. Although having a  
38 standard outcome has advantages, our more encompassing approach allows us to include  
39  
40  
41  
42  
43  
44  
45  
46  
47  
48  
49  
50  
51  
52  
53  
54  
55  
56  
57  
58  
59  
60

1  
2  
3 studies from wide time periods and different countries with different favoured methods for  
4 outcome assessment. However, the different outcome measures and small number of studies  
5 precluded exploration of sources of heterogeneity relating to patient characteristics, surgical  
6 method, peri-operative care and rehabilitation.  
7  
8  
9

10  
11 In the studies included in this review the measures may not fully describe chronic post-  
12 surgical pain. Measures that focus on pain during specific activities may not reflect the  
13 intermittent and intense pain that has the greatest impact on quality of life.[37] Another issue  
14 in considering pain as an outcome after replacement is that no account is made for the effect  
15 of analgesics and assistive aids on the reporting of pain. Self-reported analgesic use is high,  
16 with 40% of men and 58% of women taking pain medications after knee replacement,[38]  
17 and 30% of patients taking analgesics daily after hip replacement because of pain in their  
18 replaced joint.[23] We used disease specific instruments focusing on the operated joint rather  
19 than generic measures of pain. In the replacement population there are likely to be high levels  
20 of morbidity due to osteoarthritis and other conditions common in old age.  
21  
22  
23  
24  
25  
26  
27  
28

29 Our data suggests that many hip and knee replacement patients are likely to be in pain at the  
30 time when recovery from surgery should be optimal. In a cohort of 194 patients following hip  
31 or knee replacement surgery, pain was seen to achieve its lowest level by three months after  
32 surgery.[39]  
33  
34  
35

36 While acknowledging probable under-estimates of the extent of pain after surgery reported in  
37 the literature, we should recognise the effectiveness of replacement for many. However, a  
38 significant proportion of people have painful joints despite surgery and strategies to improve  
39 outcomes merit research.  
40  
41  
42  
43

44 Many determinants of long-term outcome after hip and knee replacement are described and  
45 interventions evaluated. Better general health, physical, emotional and social function,  
46 motivation and self-efficacy, and lower levels of pain before surgery and during the  
47 rehabilitation period are associated with improved short and medium term outcomes.[20, 40-  
48 42] However the evidence for benefit of pre-surgical and rehabilitation interventions is  
49 limited, particularly as few studies have been adequately powered or of sufficient  
50 duration.[43-47]  
51  
52  
53  
54  
55  
56

57 Another approach is the identification of patients before surgery who are at risk of a poor  
58 pain outcome. Kalkman et al. developed a multivariable model to predict short term pain after  
59 surgical procedures.[48] Use of a predictive model based on pre- or post-surgical factors  
60

1  
2  
3 might allow targeting of additional pain management and rehabilitation to patients likely to  
4 benefit.  
5  
6

7  
8 In conclusion, persistent pain in a hip or knee joint that has been replaced is not uncommon.  
9 For patients to participate in decisions about their care it is important that they are informed  
10 and aware of both the likely benefits of surgery and the possibility of a less favourable  
11 outcome. With this knowledge they may contribute more fully to the replacement process  
12 including preparatory strategies and long term rehabilitation. It is clear that the current move  
13 to a greater interest in patient-centred outcomes after replacement is necessary, and that there  
14 is an urgent need to address the determinants of good and bad outcomes.  
15  
16  
17  
18  
19

### 20 **Author contributions**

21  
22 PD conceived the review

23  
24 All authors contributed to the design of the review

25  
26 ADB identified and acquired reports of studies

27  
28 ADB and PD checked studies for eligibility

29  
30 ADB and VW extracted and checked data

31  
32 ADB analysed and interpreted the data

33  
34 ADB drafted the manuscript

35  
36 All authors contributed to the final version of the manuscript  
37  
38

### 39 **Competing interests**

40  
41 No financial support or other benefits have been received by any of the authors that could  
42 create a potential conflict of interest with regard to the work.  
43  
44  
45  
46

### 47 **Funding**

48  
49 This article outlines independent research commissioned by the National Institute for Health  
50 Research (NIHR) under its Programme Grants for Applied Research funding scheme (RP-  
51 PG-0407-10070). The views expressed are those of the authors and not necessarily those of  
52 the NHS, the NIHR or the Department of Health.  
53  
54  
55  
56  
57  
58  
59  
60

Table 1. Studies of total hip or knee replacement reporting proportion of patients with pain at follow up

| Author                                           | Indication                                                                                                                                                          | Follow up                                                                                                                                                      | Pain outcome measure                                                                                    | Number of patients with:                                                                            |                                                                                                                                       |                                                                                                       |
|--------------------------------------------------|---------------------------------------------------------------------------------------------------------------------------------------------------------------------|----------------------------------------------------------------------------------------------------------------------------------------------------------------|---------------------------------------------------------------------------------------------------------|-----------------------------------------------------------------------------------------------------|---------------------------------------------------------------------------------------------------------------------------------------|-------------------------------------------------------------------------------------------------------|
|                                                  |                                                                                                                                                                     |                                                                                                                                                                |                                                                                                         | Favourable outcome                                                                                  | Uncertain outcome                                                                                                                     | Unfavourable outcome                                                                                  |
| Country                                          | Population                                                                                                                                                          | Study design                                                                                                                                                   |                                                                                                         |                                                                                                     |                                                                                                                                       |                                                                                                       |
| Date of baseline                                 | Age                                                                                                                                                                 | Losses to follow up                                                                                                                                            |                                                                                                         |                                                                                                     |                                                                                                                                       |                                                                                                       |
| <i>Hip replacement</i>                           |                                                                                                                                                                     |                                                                                                                                                                |                                                                                                         |                                                                                                     |                                                                                                                                       |                                                                                                       |
| Jones et al.<br>2000[19]<br>Canada<br>1995–1997  | Primary THR, 94% OA<br>N=242 consecutive patients (includes estimated lost to follow up based on equal proportions hip/ knee lost)<br>Mean age 68.2 years (SD 11.1) | 6 month follow up<br>Prospective<br>5.8% lost to follow up or died (Losses to follow up estimated proportionately as not reported for hip and knee separately) | WOMAC pain<br>Losses to follow up estimated proportionately as not reported for hip and knee separately | 208 (no pain/ mild pain defined as more than a 10-point gain on the 100 point WOMAC pain dimension) | 14 lost to follow up (estimated)                                                                                                      | 20 (moderate/ severe pain defined as less than a 10-point gain on the 100 point WOMAC pain dimension) |
| Nikolajson et al.<br>2006[23]<br>Denmark<br>2003 | Primary THR, Degenerative hip arthritis<br>N=1231 questionnaire follow up of consecutive patients<br>Mean age 71.6 years (SD 8.7)                                   | 12–18 month follow up<br>Joint registry<br>5.9% lost to follow up                                                                                              | Authors' own scale of presence of hip pain and impact on daily life                                     | 754 (hip pain not present)                                                                          | 4 died<br>117 lost to follow up<br>62 bilateral or further operation<br>167 hip pain still present with no/ mild impact on daily life | 127 (pain with moderate, severe or very severe impact on daily life)                                  |

|                                                                               |                                                      |                                                                                                                                                                                   |                                                                                                                     |                                                                                                              |                                                                                                                                   |                                   |                                                                                                                                      |
|-------------------------------------------------------------------------------|------------------------------------------------------|-----------------------------------------------------------------------------------------------------------------------------------------------------------------------------------|---------------------------------------------------------------------------------------------------------------------|--------------------------------------------------------------------------------------------------------------|-----------------------------------------------------------------------------------------------------------------------------------|-----------------------------------|--------------------------------------------------------------------------------------------------------------------------------------|
| 1<br>2<br>3<br>4<br>5<br>6<br>7<br>8<br>9<br>10<br>11<br>12<br>13<br>14<br>15 | Nilsdotter et al.<br>2003[20]<br>Sweden<br>1995–1998 | Primary unilateral THR,<br>OA<br>N=219 consecutive<br>patients with 2 surgical<br>methods. For proportion<br>with pain at follow up<br>N=92<br>Mean age 71 years (range<br>50–92) | Mean 43 month follow up<br>Prospective<br>5.9% lost to follow up                                                    | WOMAC pain<br>Favourable/<br>unfavourable<br>estimates based on<br>extrapolation of<br>partial follow up     | 153 (Pain<br>improved by<br>more than 10/<br>100 units<br>reflecting<br>detectable<br>clinical<br>improvement)                    | 8 died<br>13 lost to follow<br>up | 45 (Pain<br>improved by<br>less than 10/<br>100 units<br>reflecting no<br>detectable<br>clinical<br>improvement)                     |
| 16<br>17<br>18<br>19<br>20<br>21<br>22<br>23<br>24<br>25<br>26<br>27          | Quintana et al.<br>2006[21]<br>Spain<br>1999–2000    | THR, OA<br>N=784 consecutive<br>patients willing to<br>participate and with<br>complete pre-surgical data<br>Mean age 69.1 years                                                  | 6 month follow up<br>Prospective<br>25.5% lost to follow up                                                         | WOMAC pain                                                                                                   | 456 (patients<br>reporting<br>improvement<br>in pain greater<br>than minimal<br>clinical<br>important<br>difference<br>24.55/100) | 200 lost to<br>follow up          | 128 (patients<br>reporting no<br>improvement<br>in pain greater<br>than minimal<br>clinical<br>important<br>difference<br>24.55/100) |
| 28<br>29<br>30<br>31<br>32<br>33<br>34<br>35<br>36<br>37                      | Singh &<br>Lewallen<br>2010[24]<br>USA<br>1993–2005  | THR, 87% OA<br>N=9154 consecutive<br>patients from joint registry<br>sent postal questionnaire<br>Mean age of patients<br>followed up 65.0 years<br>(SD 13)                       | 24 month follow up (also<br>60 month with greater<br>losses to follow up)<br>Prospective<br>37.7% lost to follow up | Single question: How<br>much pain do you<br>have in your operated<br>hip? None, mild,<br>moderate or severe. | 5272 (None or<br>mild pain)                                                                                                       | 3447 lost to<br>follow up         | 435 (moderate<br>or severe<br>pain)                                                                                                  |
| 38<br>39<br>40<br>41<br>42<br>43<br>44                                        | Wylde et al.<br>2011[22]                             | THR, majority OA<br>N= 1401 consecutive                                                                                                                                           | Median 41 month follow<br>up (range 35–48)                                                                          | WOMAC pain                                                                                                   | 818 (no pain<br>for the past 3                                                                                                    | 71 died                           | 114 (moderate<br>or severe                                                                                                           |

45  
46  
47

|                                                   |                                                                                                                                                              |                                                                                     |                                     |                                                                                                     |                                                                                                 |                                                                                    |
|---------------------------------------------------|--------------------------------------------------------------------------------------------------------------------------------------------------------------|-------------------------------------------------------------------------------------|-------------------------------------|-----------------------------------------------------------------------------------------------------|-------------------------------------------------------------------------------------------------|------------------------------------------------------------------------------------|
| UK<br>2004–2006                                   | patients<br>Median age 73 years<br>(range 65–78)                                                                                                             | Prospective with postal<br>follow up<br>47.6% lost to follow up                     |                                     | months or mild<br>persistent pain<br>in replaced<br>hip)                                            | 1 revision<br>667 lost to<br>follow up                                                          | persistent pain<br>for 3 months<br>in replaced<br>hip, WOMAC<br>0–75/100)          |
| <b><i>Knee replacement</i></b>                    |                                                                                                                                                              |                                                                                     |                                     |                                                                                                     |                                                                                                 |                                                                                    |
| Baker et al.<br>2007[29]<br>UK<br>2003            | Primary TKR, 96% OA<br>N=9417 questionnaire<br>follow up of random<br>sample of patients in joint<br>registry<br>Mean age 70.7 years<br>(range 25–98)        | 12 month follow up or<br>latest available<br>Prospective<br>14.9% lost to follow up | Oxford knee score<br>pain dimension | 6427 (did not<br>report<br>persistent knee<br>pain)                                                 | 1407 lost to<br>follow up or<br>died                                                            | 1583<br>(reported<br>persistent<br>knee pain)                                      |
| Brander et al.<br>2003[30]<br>USA<br>1998–2000    | Primary TKR, 94% OA<br>N=116 consecutive<br>patients (1 surgeon)<br>Mean age 66 years (SD<br>10.5, range 36–85)                                              | 12 month follow up<br>Prospective<br>0% lost to follow up                           | VAS pain                            | 98 (no<br>significant<br>pain, VAS<br>score ≤40)                                                    | 1 died<br>2 revision or<br>dislocation                                                          | 15 (significant<br>pain, VAS<br>score >40)                                         |
| Czurda et al.<br>2010[27]<br>Austria<br>2003–2005 | Primary TKR, OA<br>N=411 consecutive<br>patients with computer<br>assisted or conventional<br>surgery with at least 18<br>months follow up<br>Mean age 75–76 | Mean 26 month follow up<br>(range 18–42)<br>13.4% lost to follow up                 | WOMAC pain                          | 273 (no report<br>of painful<br>knees – no<br>moderate or<br>worse response<br>in any<br>WOMAC pain | 2 died<br>55 lost to follow<br>up<br>24 infection,<br>trauma, re-<br>operation, poor<br>general | 57 (painful<br>knees –<br>moderate or<br>worse<br>response in<br>any WOMAC<br>pain |



|                                                   | years(range 45–96)                                                                                                                                                 |                                                                                                                                            |                                                                                                         | dimension)                                                                                | condition                                                          | dimension)                                                                                  |
|---------------------------------------------------|--------------------------------------------------------------------------------------------------------------------------------------------------------------------|--------------------------------------------------------------------------------------------------------------------------------------------|---------------------------------------------------------------------------------------------------------|-------------------------------------------------------------------------------------------|--------------------------------------------------------------------|---------------------------------------------------------------------------------------------|
| Jones et al.<br>2000[19]<br>Canada<br>1995–1997   | Primary TKR, 94% OA<br>N=292 consecutive patients (includes estimated lost to follow up based on equal proportions hip/ knee lost)<br>Mean age 69.2 years (SD 9.2) | 6 month follow up<br>Prospective<br>5.5% lost to follow up or died (estimated proportionately as not reported for hip and knee separately) | WOMAC pain<br>Losses to follow up estimated proportionately as not reported for hip and knee separately | 222 (no pain/ mild pain defined as more than a 10-point gain on the WOMAC pain dimension) | 16 lost to follow up or died (estimated)                           | 54 (moderate/ severe pain defined as less than a 10-point gain on the WOMAC pain dimension) |
| Lundblad et al.<br>2008[31]<br>Sweden             | TKR, OA<br>N=69 patients scheduled for knee replacement<br>Mean age 68 years (range 40–80)                                                                         | 18 month follow up<br>Prospective<br>10.1% lost to follow up (including deaths)                                                            | VAS pain                                                                                                | 21 (no pain at rest or with movement)                                                     | 7 lost to follow up or died<br>26 pain with movement               | 15 (pain at rest and movement)                                                              |
| Nilsson et al.<br>2009[28]<br>Sweden<br>1999–2001 | Primary TKR, OA<br>N=102 responders to postal survey on waiting list for knee replacement<br>Mean age 71 years (SD 8, range 51–86)                                 | 60 month follow up<br>Prospective<br>12.7% lost to follow up                                                                               | KOOS pain compared with pre-operatively                                                                 | 47 (much less or less pain than pre-operatively)                                          | 9 died<br>13 lost to follow up<br>6 operated bilaterally           | 27 (similar or more pain than pre-operatively)                                              |
| Núñez et al.<br>2007[26]<br>Spain<br>2000–2001    | Primary TKR, OA<br>N=88 consecutive patients<br>Mean age 74.8 years (SD 5.6)                                                                                       | 36 month follow up<br>Prospective<br>8.0% lost to follow up                                                                                | WOMAC pain                                                                                              | 60 (improvement in postoperative pain scores)                                             | 1 died<br>7 lost to follow up<br>13 contralateral or other surgery | 7 (no improvement in postoperative pain scores)                                             |

|                                                                                        |                                                   |                                                                                                                                  |                                                                                                               |                                                                                                                                           |                                                                                                                                  |                                                   |                                                                                                                                     |
|----------------------------------------------------------------------------------------|---------------------------------------------------|----------------------------------------------------------------------------------------------------------------------------------|---------------------------------------------------------------------------------------------------------------|-------------------------------------------------------------------------------------------------------------------------------------------|----------------------------------------------------------------------------------------------------------------------------------|---------------------------------------------------|-------------------------------------------------------------------------------------------------------------------------------------|
| 1<br>2<br>3<br>4<br>5<br>6<br>7<br>8<br>9<br>10<br>11<br>12<br>13<br>14                | Quintana et al.<br>2006[21]<br>Spain<br>1999–2000 | TKR, OA<br>N=792 consecutive<br>patients willing to<br>participate and with<br>complete pre-surgical data<br>Mean age 71.9 years | 6 month follow up<br>Prospective<br>24.1% lost to follow up                                                   | WOMAC pain                                                                                                                                | 402 (patients<br>reporting<br>improvement<br>in pain greater<br>than minimal<br>clinical<br>important<br>difference<br>22.6/100) | 191 lost to<br>follow up                          | 199 (patients<br>reporting no<br>improvement<br>in pain greater<br>than minimal<br>clinical<br>important<br>difference<br>22.6/100) |
| 15<br>16<br>17<br>18<br>19<br>20<br>21<br>22                                           | Stephens<br>2002[25]<br>USA                       | TKR, OA<br>N=68 patients referred for<br>knee replacement aged 50<br>years or older<br>Mean age 67.4 years                       | 6 month follow up<br>Prospective<br>7.4% lost to follow up                                                    | WOMAC                                                                                                                                     | 52 (decrease in<br>pain)                                                                                                         | 5 lost to follow<br>up                            | 11 (no change<br>or increase in<br>pain)                                                                                            |
| 23<br>24<br>25<br>26<br>27<br>28<br>29<br>30<br>31<br>32                               | Vuorenmaa<br>2008[32]<br>Finland                  | TKR, OA<br>N=51 patients referred for<br>knee replacement<br>Mean age 70 (SD 5)                                                  | 3 month follow up<br>Prospective<br>11.8% lost to follow up                                                   | VAS pain<br>Pain calculated from<br>20% followed up had<br>moderate or severe<br>pain (defined as score<br>of >30 on a 100mm<br>pain VAS) | 34 (none or<br>mild pain)                                                                                                        | 1 died<br>6 lost to follow<br>up<br>1 infection   | 9 (moderate or<br>severe pain)                                                                                                      |
| 33<br>34<br>35<br>36<br>37<br>38<br>39<br>40<br>41<br>42<br>43<br>44<br>45<br>46<br>47 | Wylde et al.<br>2011[22]<br>UK<br>2004–2006       | TKR, majority OA<br>N= 1394 consecutive<br>patients<br>Median age 73 (range 28–<br>96)                                           | Median 28 month follow<br>up (range 14–43)<br>Prospective with postal<br>follow up<br>45.3% lost to follow up | WOMAC pain                                                                                                                                | 433 (no pain<br>for the past 3<br>months or mild<br>persistent pain<br>in replaced<br>hip)                                       | 62 died<br>4 revision<br>696 lost to<br>follow up | 199 (moderate<br>or severe<br>persistent pain<br>for 3 months<br>in replaced<br>hip, WOMAC                                          |

---

0–75/100)

---

THR total hip replacement, TKR total knee replacement, OA osteoarthritis, WOMAC Western Ontario and McMaster Universities Arthritis Index, VAS visual analogue scale, KOOS Knee Osteoarthritis Outcome Score

For peer review only

## References

1. National Joint Registry for England and Wales: 7th Annual Report. NJR Centre, Hemel Hempstead 2010.
2. DeFrances CJ, Lucas CA, Buie VC et al. 2006 National Hospital Discharge Survey. National health statistics reports; no 5. National Center for Health Statistics, Hyattsville MD 2008.
3. Kurtz S, Ong K, Lau E et al. Projections of primary and revision hip and knee arthroplasty in the United States from 2005 to 2030. *J Bone Joint Surg* 2007;**89-A**:780-785.
4. Ranawat CS, Atkinson RE, Salvati EA et al. Conventional total hip arthroplasty for degenerative joint disease in patients between the ages of forty and sixty years. *J Bone Joint Surg* 1984;**66-A**:745-752.
5. Aamodt A, Nordsletten L, Havelin LI et al. Documentation of hip prostheses used in Norway: A critical review of the literature from 1996-2000. *Acta Orthop Scand* 2004;**75**:663-676.
6. Ng CY, Ballantyne JA, Brenkel IJ. Quality of life and functional outcome after primary total hip replacement: A five-year follow-up. *J Bone Joint Surg* 2007;**89-B**:868-873.
7. Woolhead GM, Donovan JL, Dieppe PA. Outcomes of total knee replacement: a qualitative study. *Rheumatology* 2005;**44**:1032-1037.
8. Judge A, Cooper C, Williams S et al. Patient-reported outcomes one year after primary hip replacement in a European Collaborative Cohort. *Arthritis Care Res* 2010;**62**:480-488.

- 1  
2  
3 9. Jha AK, Orav EJ, Zheng J et al. Patients' perception of hospital care in the United  
4 States. *NEJM* 2008;**359**:1921-1931.  
5  
6  
7
- 8  
9 10. Darzi A. High quality care for all: NHS next stage review final report. Department of  
10 Health, London 2008  
11  
12
- 13 11. Guidance on the routine collection of Patient Reported Outcome Measures (PROMs).  
14 Department of Health, London 2009  
15  
16  
17
- 18 12. Murray DW, Britton AR, Bulstrode CJ. Loss to follow-up matters. *J Bone Joint Surg*  
19 1997;**79-B**:254-257.  
20  
21  
22
- 23 13. Konig A, Schreiber B, Rader C et al. A comparison of knee and function score of  
24 patients lost to follow-up with patients reattending a prospective total knee arthroplasty study.  
25  
26  
27  
28  
29  
30  
31  
32  
33  
34  
35  
36  
37  
38  
39  
40  
41  
42  
43  
44  
45  
46  
47  
48  
49  
50  
51  
52  
53  
54  
55  
56  
57  
58  
59  
60  
18. Mullan RJ, Flynn DN, Carlberg B et al. Systematic reviewers commonly contact  
study authors but do so with limited rigor. *J Clin Epidemiol* 2009;**62**:138-142.

- 1  
2  
3  
4  
5  
6  
7  
8  
9  
10  
11  
12  
13  
14  
15  
16  
17  
18  
19  
20  
21  
22  
23  
24  
25  
26  
27  
28  
29  
30  
31  
32  
33  
34  
35  
36  
37  
38  
39  
40  
41  
42  
43  
44  
45  
46  
47  
48  
49  
50  
51  
52  
53  
54  
55  
56  
57  
58  
59  
60
19. Jones CA, Voaklander DC, Johnston DWC et al. Health related quality of life outcomes after total hip and knee arthroplasties in a community based population. *J Rheumatol* 2000;**27**:1745-1752.
  20. Nilsson AK, Petersson IF, Roos EM et al. Predictors of patient relevant outcome after total hip replacement for osteoarthritis: A prospective study. *Ann Rheum Dis* 2003;**62**:923-930.
  21. Quintana JM, Escobar A, Arostegui I et al. Health-related quality of life and appropriateness of knee or hip joint replacement. *Arch Int Med* 2006;**166**:220-226.
  22. Wylde V, Hewlett S, Learmonth ID et al. Persistent pain after joint replacement: Prevalence, sensory qualities, and postoperative determinants. *Pain* 2011;**152**:566-572.
  23. Nikolajsen L, Brandsborg B, Lucht U et al. Chronic pain following total hip arthroplasty: a nationwide questionnaire study. *Acta Anaesthesiol Scand* 2006;**50**:495-500.
  24. Singh J, Lewallen D. Predictors of pain and use of pain medications following primary Total Hip Arthroplasty (THA): 5,707 THAs at 2-years and 3,289 THAs at 5-years. *BMC Musculoskeletal Disord* 2010;**11**:
  25. Stephens MAP, Druley JA, Zautra AJ. Older adults' recovery from surgery for osteoarthritis of the knee: psychosocial resources and constraints as predictors of outcomes. *Health Psych* 2002;**21**:377-383.
  26. Núñez M, Núñez E, del Val JL et al. Health-related quality of life in patients with osteoarthritis after total knee replacement: Factors influencing outcomes at 36 months of follow-up. *Osteoarthritis Cart* 2007;**15**:1001-1007.
  27. Czurda T, Fennema P, Baumgartner M et al. The association between component malalignment and post-operative pain following navigation-assisted total knee arthroplasty:

1  
2  
3 results of a cohort/nested case-control study. *Knee Surg Sports Traumatol Arthrosc*  
4  
5 2010;**18**:863-869.  
6  
7

8  
9 28. Nilsson AK, Toksvig-Larsen S, Roos EM. Knee arthroplasty: are patients'  
10 expectations fulfilled? A prospective study of pain and function in 102 patients with 5-year  
11 follow-up. *Acta Orthop* 2009;**80**:55-61.  
12  
13

14  
15 29. Baker PN, van der Meulen JH, Lewsey J et al. The role of pain and function in  
16 determining patient satisfaction after total knee replacement. Data from the National Joint  
17 Registry for England and Wales. *J Bone Joint Surg* 2007;**89-B**:893-900.  
18  
19

20  
21 30. Brander VA, Stulberg SD, Adams AD et al. Predicting total knee replacement pain: a  
22 prospective, observational study. *Clin Orthop Relat Res* 2003;**416**:27-36.  
23  
24

25  
26 31. Lundblad H, Kreicbergs A, Jansson KA. Prediction of persistent pain after total knee  
27 replacement for osteoarthritis. *J Bone Joint Surg* 2008;**90-B**:166-171.  
28  
29

30  
31 32. Vuorenmaa M, Ylinen J, Kiviranta I et al. Changes in pain and physical function  
32 during waiting time and 3 months after knee joint arthroplasty. *J Rehabil Med* 2008;**40**:570-  
33 575.  
34  
35

36  
37 33. Puhan M, Soesilo I, Guyatt G et al. Combining scores from different patient reported  
38 outcome measures in meta-analyses: when is it justified? *Health Qual Life Outcomes*  
39 2006;**4**:94.  
40  
41

42  
43 34. Kane RL, Saleh KJ, Wilt TJ et al. The functional outcomes of total knee arthroplasty.  
44 *J Bone Joint Surg* 2005;**87-A**:1719-1724.  
45  
46

47  
48 35. Ethgen O, Bruyere O, Richy F et al. Health-related quality of life in total hip and total  
49 knee arthroplasty: A qualitative and systematic review of the literature. *J Bone Joint Surg*  
50 2004;**86-A**:963-974.  
51  
52  
53  
54  
55  
56  
57  
58  
59  
60

- 1  
2  
3 36. Bourne R, Chesworth B, Davis A et al. Patient satisfaction after total knee  
4  
5  
6  
7  
8  
9  
10  
11  
12  
13  
14  
15  
16  
17  
18  
19  
20  
21  
22  
23  
24  
25  
26  
27  
28  
29  
30  
31  
32  
33  
34  
35  
36  
37  
38  
39  
40  
41  
42  
43  
44  
45  
46  
47  
48  
49  
50  
51  
52  
53  
54  
55  
56  
57  
58  
59  
60
36. Bourne R, Chesworth B, Davis A et al. Patient satisfaction after total knee arthroplasty: Who is satisfied and who is not? *Clin Orthop Relat Res* 2010;**468**:57-63.
37. Hawker GA, Stewart L, French MR et al. Understanding the pain experience in hip and knee osteoarthritis - an OARSI/OMERACT initiative. *Osteoarthritis Cart* 2008;**16**:415-422.
38. Hawker G, Wright J, Coyte P et al. Health-related quality of life after knee replacement. Results of the knee replacement patient outcomes research team study. *J Bone Joint Surg* 1998;**80-A**:163-173.
39. Bachmeier CJM, March LM, Cross MJ et al. A comparison of outcomes in osteoarthritis patients undergoing total hip and knee replacement surgery. *Osteoarthritis Cart* 2001;**9**:137-146.
40. Rolfson O, Dahlberg LE, Nilsson J-A et al. Variables determining outcome in total hip replacement surgery. *J Bone Joint Surg Br* 2009;**91-B**:157-161.
41. Dohnke B, Knäuper B, Müller-Farnow W. Perceived self-efficacy gained from, and health effects of, a rehabilitation program after hip joint replacement. 2005;**53**:585-592.
42. Jones CA, Beaupre LA, Johnston DWC et al. Total joint arthroplasties: Current concepts of patient outcomes after surgery. *Rheum Dis Clin North Am* 2007;**33**:71-86.
43. Ackerman IN, Bennell KL. Does pre-operative physiotherapy improve outcomes from lower limb joint replacement surgery? A systematic review. *Australian J Physiother* 2004;**50**:25-30.
44. McDonald S, Hetrick SE, Green S. Pre-operative education for hip or knee replacement. *Cochrane Database Syst Rev* 2004;CD003526.



- 1  
2  
3  
4  
5  
6  
7  
8  
9  
10  
11  
12  
13  
14  
15  
16  
17  
18  
19  
20  
21  
22  
23  
24  
25  
26  
27  
28  
29  
30  
31  
32  
33  
34  
35  
36  
37  
38  
39  
40  
41  
42  
43  
44  
45  
46  
47  
48  
49  
50  
51  
52  
53  
54  
55  
56  
57  
58  
59  
60
45. Minns Lowe CJ, Barker KL, Dewey M et al. Effectiveness of physiotherapy exercise after knee arthroplasty for osteoarthritis: Systematic review and meta-analysis of randomised controlled trials. *BMJ* 2007;**335**:812-815.
46. Minns Lowe C, Barker K, Dewey M et al. Effectiveness of physiotherapy exercise following hip arthroplasty for osteoarthritis: A systematic review of clinical trials. *BMC Musculoskeletal Disord* 2009;**10**:1:
47. Khan F, Ng L, Gonzalez S et al. Multidisciplinary rehabilitation programmes following joint replacement at the hip and knee in chronic arthropathy. *Cochrane Database Syst Rev* 2008;CD004957.
48. Kalkman CJ, Visser K, Moen J et al. Preoperative prediction of severe postoperative pain. *Pain* 2003;**105**:415-423.

Figure 1. Systematic review flow diagram

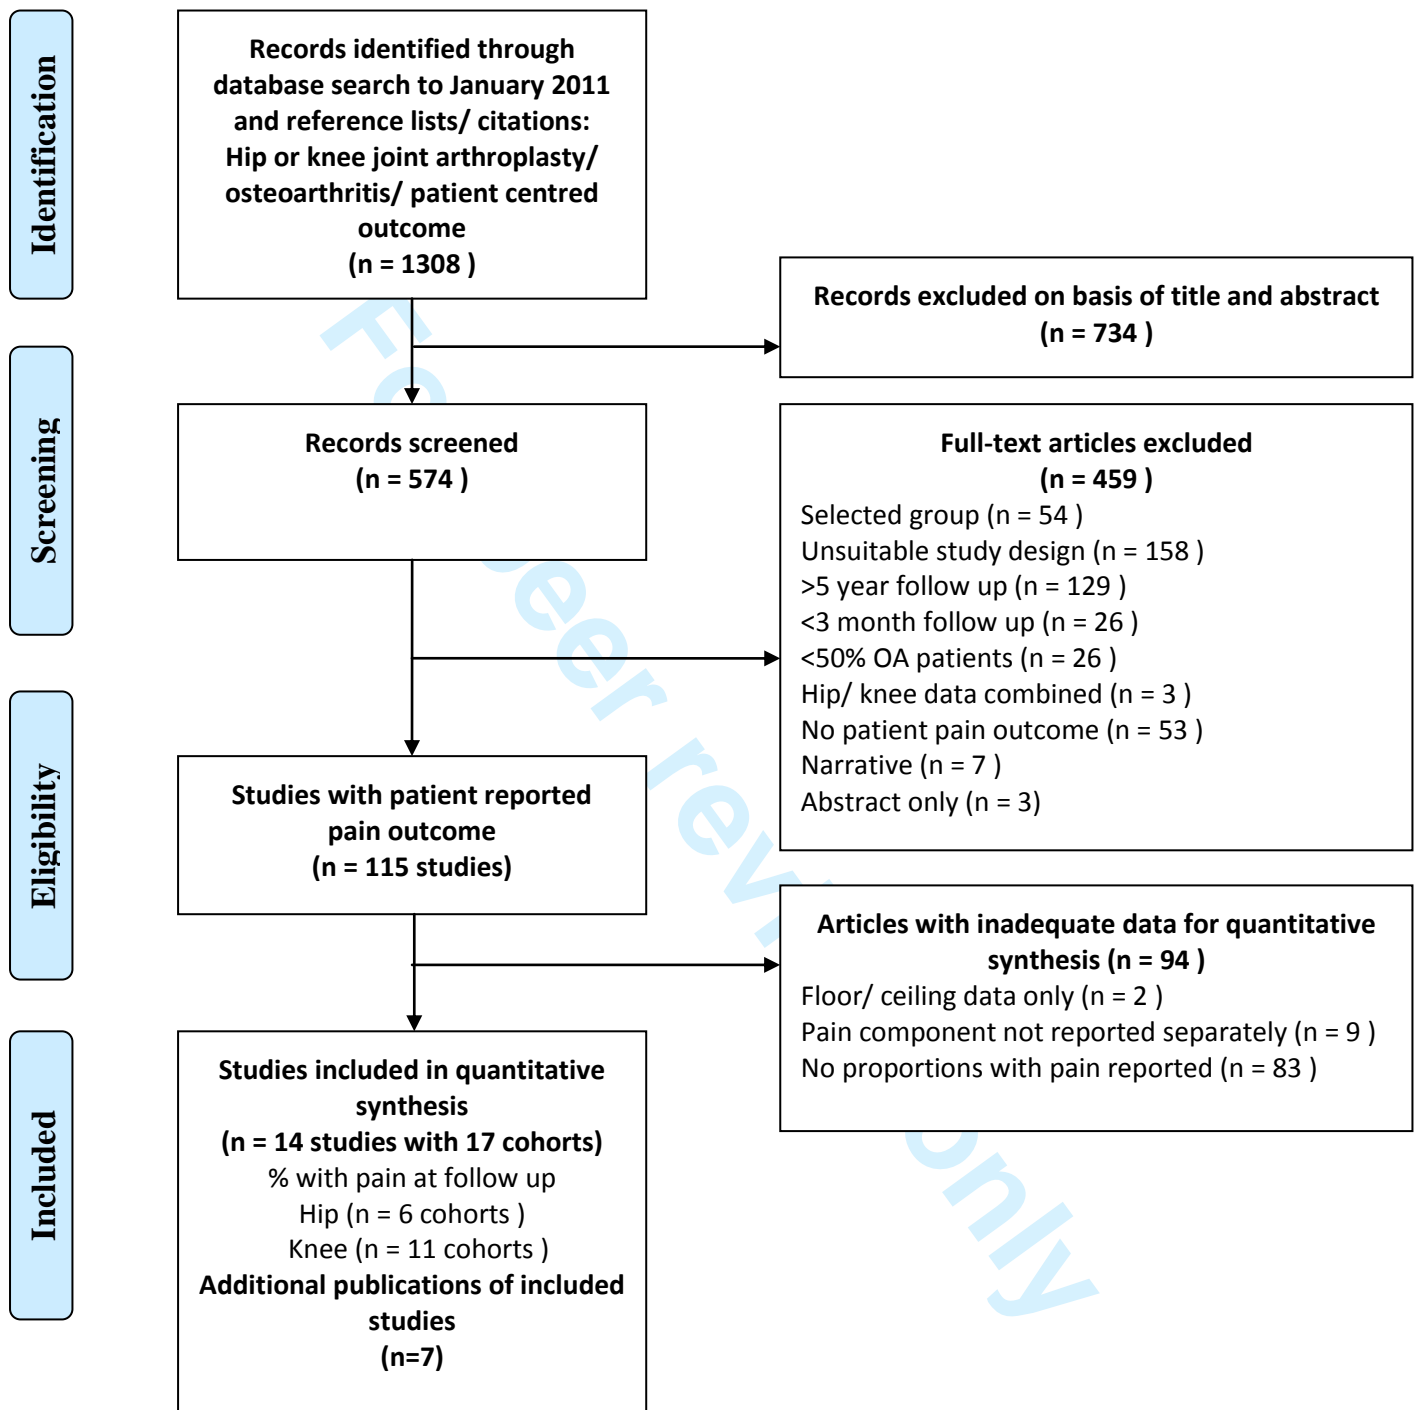

**Figure 2. Studies of hip or knee replacement reporting proportion of patients with pain at follow up**

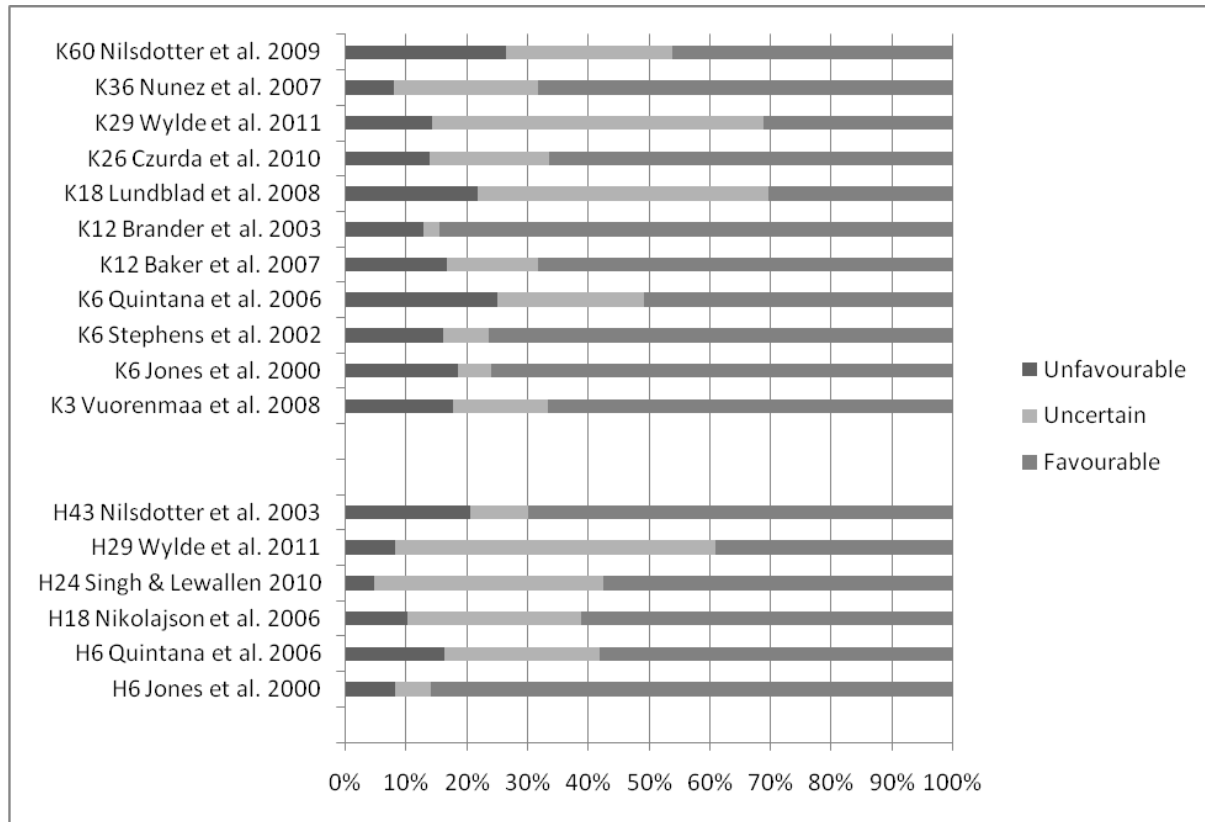

Proportion of patients with outcome

Preceding study author: H (hip) K (knee) and months (follow up)

1  
2  
3  
4  
5  
6  
7  
8  
9  
10  
11  
12  
13  
14  
15  
16  
17  
18  
19  
20  
21  
22  
23  
24  
25  
26  
27  
28  
29  
30  
31  
32  
33  
34  
35  
36  
37  
38  
39  
40  
41  
42  
43  
44  
45  
46  
47  
48  
49  
50  
51  
52  
53  
54  
55  
56  
57  
58  
59  
60

## Appendix 1. MOOSE Checklist

| <b>Reporting of background should include</b>                                 |                                                                                                                                                                                                                                                                                                                                    |
|-------------------------------------------------------------------------------|------------------------------------------------------------------------------------------------------------------------------------------------------------------------------------------------------------------------------------------------------------------------------------------------------------------------------------|
| Problem definition                                                            | Page 3. Background                                                                                                                                                                                                                                                                                                                 |
| Hypothesis statement                                                          | Page 3. Background paragraph 3                                                                                                                                                                                                                                                                                                     |
| Description of study outcome(s)                                               | Page 3. Background paragraph 3<br>Page 4. disease specific patient reported outcome measures described<br>Page 5. Data synthesis and analysis                                                                                                                                                                                      |
| Type of exposure or intervention used                                         | Page 3. Background. Total hip or knee replacement                                                                                                                                                                                                                                                                                  |
| Type of study designs used                                                    | Page 4. Study selection. Consecutive/unselected populations                                                                                                                                                                                                                                                                        |
| Study population                                                              | Page 4. Study selection. Consecutive/unselected populations                                                                                                                                                                                                                                                                        |
| <b>Reporting of search strategy should include</b>                            |                                                                                                                                                                                                                                                                                                                                    |
| Qualifications of searchers (eg, librarians and investigators)                | Page 4. Study selection. Researchers experienced in systematic reviews and rheumatology                                                                                                                                                                                                                                            |
| Search strategy, including time period included in the synthesis and keywords | Page 4. Data sources and searches, and Appendix 2                                                                                                                                                                                                                                                                                  |
| Effort to include all available studies, including contact with authors       | Page 5. Data extraction and quality assessment. We did not contact authors as many studies were over 10 years old. Also considered in discussion (page 10)<br>Page 4. Study selection. Completeness of database was assessed by checking inclusion of articles in reference lists provided by experienced researchers in the field |

|                                                                                                            |                                                                                                                                                                                                                                                                                                                                                                                                                                                                                            |
|------------------------------------------------------------------------------------------------------------|--------------------------------------------------------------------------------------------------------------------------------------------------------------------------------------------------------------------------------------------------------------------------------------------------------------------------------------------------------------------------------------------------------------------------------------------------------------------------------------------|
| Databases and registries searched                                                                          | Page 4. Data sources and searches                                                                                                                                                                                                                                                                                                                                                                                                                                                          |
| Search software used, name and version, including special features used (eg, explosion)                    | Page 4. Data sources and searches.                                                                                                                                                                                                                                                                                                                                                                                                                                                         |
| Use of hand searching (eg, reference lists of obtained articles)                                           | Page 4. Data sources and searches.                                                                                                                                                                                                                                                                                                                                                                                                                                                         |
| List of citations located and those excluded, including justification                                      | PRISMA style flow diagram shown in Figure 1                                                                                                                                                                                                                                                                                                                                                                                                                                                |
| Method of addressing articles published in languages other than English                                    | Page 4. Data sources and searches. No exclusions on basis of language                                                                                                                                                                                                                                                                                                                                                                                                                      |
| Method of handling abstracts and unpublished studies                                                       | Page 4. Data sources and searches. We did not include studies only published as abstracts                                                                                                                                                                                                                                                                                                                                                                                                  |
| Description of any contact with authors                                                                    | Page 5. Data extraction and quality assessment. Page 10. Discussion. We did not approach authors of studies with pain measured at follow up but not reported as proportions with degrees of pain. In recent reviews (Beswick et al. Lancet 2008, Beswick et al. Reviews in Clinical Gerontology 2010) we had additional data provided by under half of authors. Recent review by Mullan et al. 2009 suggests this is a common issue in reviews. This is considered in discussion (page 10) |
| <b>Reporting of methods should include</b>                                                                 |                                                                                                                                                                                                                                                                                                                                                                                                                                                                                            |
| Description of relevance or appropriateness of studies assembled for assessing the hypothesis to be tested | Pages 2-9. Results                                                                                                                                                                                                                                                                                                                                                                                                                                                                         |
| Rationale for the selection and coding of data (eg, sound clinical principles or convenience)              | Pages 5-6. Data synthesis and analysis                                                                                                                                                                                                                                                                                                                                                                                                                                                     |

|                                                                                                                                                                                                                                                                              |                                                                                                                                                                                                                                                                                                                 |
|------------------------------------------------------------------------------------------------------------------------------------------------------------------------------------------------------------------------------------------------------------------------------|-----------------------------------------------------------------------------------------------------------------------------------------------------------------------------------------------------------------------------------------------------------------------------------------------------------------|
| Documentation of how data were classified and coded (eg, multiple raters, blinding, and interrater reliability)                                                                                                                                                              | Pages 4-6. Study selection and Data extraction and quality assessment                                                                                                                                                                                                                                           |
| Assessment of confounding (eg, comparability of cases and controls in studies where appropriate)                                                                                                                                                                             | Pages 3,4,6. We identified only studies where populations were representative of the population receiving joint replacement                                                                                                                                                                                     |
| Assessment of study quality, including blinding of quality assessors; stratification or regression on possible predictors of study results                                                                                                                                   | Pages 3,4,5,10-11. We included only studies in unselected groups of patients that were representative of the joint replacement population                                                                                                                                                                       |
| Assessment of heterogeneity                                                                                                                                                                                                                                                  | Page 9-11. We acknowledge interesting issues relating to heterogeneity. However there were insufficient studies, and in each of hip and knee a particularly large study. Our primary objective was to estimate the proportion of people with moderate or severe pain in representative, unselected populations. |
| Description of statistical methods (eg, complete description of fixed or random effects models, justification of whether the chosen models account for predictors of study results, dose-response models, or cumulative meta-analysis) in sufficient detail to be replicated | Estimate of overall proportions with outcomes calculated                                                                                                                                                                                                                                                        |
| Provision of appropriate tables and graphics                                                                                                                                                                                                                                 | Results summarised in Figure 2                                                                                                                                                                                                                                                                                  |
| <b>Reporting of results should include</b>                                                                                                                                                                                                                                   |                                                                                                                                                                                                                                                                                                                 |
| Graphic summarizing individual study estimates and overall estimate                                                                                                                                                                                                          | Figure 2 and Results section                                                                                                                                                                                                                                                                                    |
| Table giving descriptive information for each study included                                                                                                                                                                                                                 | Table 1                                                                                                                                                                                                                                                                                                         |

|                                                                                                                           |                                                                                                                                                                                                              |
|---------------------------------------------------------------------------------------------------------------------------|--------------------------------------------------------------------------------------------------------------------------------------------------------------------------------------------------------------|
| Results of sensitivity testing (eg, subgroup analysis)                                                                    |                                                                                                                                                                                                              |
| Indication of statistical uncertainty of findings                                                                         | Discussed in detail in Results section and Discussion                                                                                                                                                        |
| <b>Reporting of discussion should include</b>                                                                             |                                                                                                                                                                                                              |
| Quantitative assessment of bias (eg, publication bias)                                                                    | Page 10                                                                                                                                                                                                      |
| Justification for exclusion (eg, exclusion of non-English-language citations)                                             |                                                                                                                                                                                                              |
| Assessment of quality of included studies                                                                                 | Page 11. We discuss this in the context of losses to follow up                                                                                                                                               |
| <b>Reporting of conclusions should include</b>                                                                            |                                                                                                                                                                                                              |
| Consideration of alternative explanations for observed results                                                            | Pages 10-11. The possible outcomes of those patients not followed up are discussed                                                                                                                           |
| Generalisation of the conclusions (ie, appropriate for the data presented and within the domain of the literature review) | Pages 9. We think that reporting the proportion of people with a poor pain outcome across the studies is the best approach. A measured speculation on outcomes of those lost to follow up seems appropriate. |
| Guidelines for future research                                                                                            | Page 11. Possible interventions suggested based on determinants of good and bad outcomes.                                                                                                                    |
| Disclosure of funding source                                                                                              | Funding described                                                                                                                                                                                            |

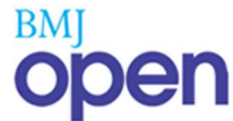

**What proportion of patients report long-term pain after total hip or knee replacement for osteoarthritis? A systematic review of prospective studies in unselected patients**

|                                 |                                                                                                                                                                                                                                                                                                                                                                         |
|---------------------------------|-------------------------------------------------------------------------------------------------------------------------------------------------------------------------------------------------------------------------------------------------------------------------------------------------------------------------------------------------------------------------|
| Journal:                        | <i>BMJ Open</i>                                                                                                                                                                                                                                                                                                                                                         |
| Manuscript ID:                  | bmjopen-2011-000435.R1                                                                                                                                                                                                                                                                                                                                                  |
| Article Type:                   | Research                                                                                                                                                                                                                                                                                                                                                                |
| Date Submitted by the Author:   | 03-Jan-2012                                                                                                                                                                                                                                                                                                                                                             |
| Complete List of Authors:       | Beswick, Andrew; University of Bristol, School of Clinical Sciences<br>Wylde, Vikki; University of Bristol, School of Clinical Sciences<br>Gooberman-Hill, Rachael; University of Bristol, School of Clinical Sciences<br>Blom, Ashley; University of Bristol, School of Clinical Sciences<br>Dieppe, Paul; Peninsula Medical School, Clinical Education Research Group |
| <b>Primary Subject Heading</b>: | Surgery                                                                                                                                                                                                                                                                                                                                                                 |
| Secondary Subject Heading:      | Rehabilitation medicine                                                                                                                                                                                                                                                                                                                                                 |
| Keywords:                       | Hip < ORTHOPAEDIC & TRAUMA SURGERY, Knee < ORTHOPAEDIC & TRAUMA SURGERY, Orthopaedic & trauma surgery < SURGERY                                                                                                                                                                                                                                                         |
|                                 |                                                                                                                                                                                                                                                                                                                                                                         |

SCHOLARONE™  
Manuscripts



1  
2  
3 **What proportion of patients report long-term pain after total hip or knee replacement**  
4 **for osteoarthritis? A systematic review of prospective studies in unselected patients**  
5

6  
7 **Article summary**  
8

9 *Article focus*  
10

- 11 • Total hip and knee replacement have good clinical outcomes.
- 12
- 13 • There is a perception that some people experience long-term pain after their joint  
14 replacement.
- 15
- 16
- 17 • We aim to establish the proportion of patients experiencing long-term pain after joint  
18 replacement.  
19

20  
21 *Key messages*  
22

- 23 • Well conducted studies in representative populations of patients with total hip and  
24 knee joint replacement suggest that a significant proportion of people continue to have  
25 painful joints after surgery.  
26
- 27
- 28 • The proportion of people with an unfavourable long-term pain outcome in studies  
29 ranged from about 7 to 23% after hip, and 10 to 34% after knee replacement. In the  
30 best quality studies an unfavourable pain outcome was reported in 9% or more of  
31 patients after total hip, and about 20% of patients after total knee replacement.  
32
- 33
- 34 • There is an urgent need to improve general awareness that some patients experience  
35 long-term pain after joint replacement, and to address the determinants of good and  
36 bad outcomes.  
37  
38  
39

40  
41 *Strengths and limitations of this study*  
42

- 43 • Systematic review conducted according to established methods and guidelines  
44 identified 17 studies in representative populations of patients with total hip or knee  
45 replacement  
46
- 47
- 48 • Pain outcome data is widely recorded as mean values but only a minority of studies  
49 reported outcomes as proportions with pain at follow up.  
50
- 51
- 52 • The small number of studies and different pain outcome measures precluded meta-  
53 analysis, calculation of a summary estimate, and exploration of sources of  
54 heterogeneity.  
55  
56  
57  
58  
59  
60

## Abstract

### *Background*

Total hip or knee replacement is highly successful when judged by prosthesis related outcomes. However some people experience long-term pain.

### *Objectives*

To review published studies in representative populations with total hip or knee replacement for the treatment of osteoarthritis reporting proportions of people by pain intensity.

### *Data sources*

MEDLINE and EMBASE databases searched to January 2011 with no language restrictions. Citations of key articles in ISI Web of Science, and reference lists were checked.

### *Study eligibility criteria, participants, and interventions*

Prospective studies of consecutive, unselected osteoarthritis patients representative of the primary total hip or knee replacement population, with intensities of patient-centred pain measured after 3 months to 5 years follow up.

### *Study appraisal and synthesis methods*

Two authors screened titles and abstracts. Data extracted by one author was checked independently against original articles by a second. For each study we summarised the proportions of people with different severities of pain in the operated joint.

### *Results*

Searches identified 1308 articles of which 115 reported patient-centred pain outcomes. Fourteen articles describing 17 cohorts (6 with hip and 11 with knee replacement) presented appropriate data on pain intensity. The proportion of people with an unfavourable long-term pain outcome in studies ranged from about 7 to 23% after hip, and 10 to 34% after knee replacement. In the best quality studies an unfavourable pain outcome was reported in 9% or more of patients after hip, and about 20% of patients after knee replacement.

### *Limitations*

Other studies reported mean values of pain outcomes. These and routine clinical studies are potential sources of relevant data.

### *Conclusions and implications of key findings*

1  
2  
3  
4  
5  
6  
7  
8  
9  
10  
11  
12  
13  
14  
15  
16  
17  
18  
19  
20  
21  
22  
23  
24  
25  
26  
27  
28  
29  
30  
31  
32  
33  
34  
35  
36  
37  
38  
39  
40  
41  
42  
43  
44  
45  
46  
47  
48  
49  
50  
51  
52  
53  
54  
55  
56  
57  
58  
59  
60

After hip and knee replacement a significant proportion of people have painful joints. There is an urgent need to improve general awareness of this possibility and to address determinants of good and bad outcomes.

For peer review only

## Introduction

Symptoms of osteoarthritis are managed in the community but if pharmacological and conservative treatments provide inadequate relief then total joint replacement is commonly performed. In England and Wales during the year ending March 2010 there were 71,021 primary total hip and 79,263 primary total knee replacement operations recorded in the National Joint Registry,[1] In the USA in 2006, the estimated numbers of hospital discharges after total hip or knee replacement procedures were 231,000 and 542,000 respectively,[2] with demand predicted to increase substantially.[3]

Total hip or knee replacement is highly successful when judged by prosthesis related outcomes, such as the radiographic appearance of the prosthesis,[4] implant survival,[5] or surgeon assessed outcome.[6] Nevertheless, many people continue to experience significant pain and functional problems after total joint replacement. Woolhead and colleagues conducted in-depth interviews with ten patients six-months after their total knee replacement.[7] Although patients considered their joint replacement successful, eight of the ten patients still experienced pain and immobility. In a European collaborative study of 1327 patients with total hip replacement, Judge and colleagues applied three recognised criteria for general symptomatic improvement[8]with symptom severity based on pain, stiffness and physical function according to the WOMAC osteoarthritis index.[9] The different criteria suggested that between 14 and 36% of patients did not improve or were worse 12 months after surgery.

Pain is the most important factor in the decision to recommend total joint replacement.[10] Furthermore, patient-reported pain is now widely assessed using disease-specific outcome measures. In the USA, the importance of patient-reported outcomes in assessing quality of care is recognised,[11] and in England, following the report of Lord Darzi,[12] information is routinely collected after elective surgery.[13]

Reporting of pain outcomes in the orthopaedic literature frequently emphasises improvement in mean scores. An example of this is the study of Bachmeier and colleagues where the improvement of mean WOMAC pain scores at three, six, nine and 12 months after hip or knee replacement is clearly demonstrated.[14] However, at all time points, the mean pain score has an associated standard deviation implying that a proportion of patients still reported pain. To advise both patients and their healthcare professionals, it is important to have a clear understanding of the frequency and extent of pain following total hip or knee replacement.

1  
2  
3 We have used systematic review methods to identify studies reporting the proportion of  
4 people with significant long-term pain after total hip or knee replacement. We aimed to  
5 identify studies in populations representative of contemporary clinical practice. Some  
6 information on all patients in cohorts is required as patients lost to follow up may have  
7 experienced poorer or at least similar outcomes to those followed up.[15-18]  
8  
9

## 10 11 **Methods**

12 We used systematic review methods in accordance with the MOOSE proposal for reporting  
13 systematic reviews and meta-analyses of observational studies.[19] A MOOSE checklist is  
14 shown in Appendix 1.  
15  
16

### 17 ***Data sources and searches***

18 MEDLINE and EMBASE databases were searched from inception to January 31<sup>st</sup> 2011. A  
19 general search was performed to identify quantitative research in primary total hip or knee  
20 replacement. The MEDLINE search strategy is shown in Appendix 2. Search terms related  
21 to: hip or knee replacement; and studies with an epidemiological design including prospective  
22 and longitudinal studies. No language restrictions were applied.  
23  
24  
25  
26  
27  
28  
29

30 Within titles, abstracts and keywords of articles identified, we searched for text words  
31 relating to osteoarthritis and *disease specific patient-centred pain outcome measures* used in  
32 osteoarthritis and joint replacement. Specifically these were: Western Ontario (WOMAC),  
33 Arthritis Impact (AIMS), Lequesne, Oxford hip or Oxford knee score, Hip Osteoarthritis  
34 Outcome Score (HOOS) or Knee Osteoarthritis Outcome Score (KOOS), pain visual  
35 analogue scales (VAS), and self appraisal. Outcomes not considered patient-centred were  
36 Knee Society, Harris Hip, American Knee Society, and Bristol Knee Scores. We did not  
37 include generic health measures including the Health Assessment Questionnaire (HAQ),  
38 EuroQol, London Handicap Scale (LHS), Medical Outcomes Study Short Form-36 (SF-36),  
39 Disease Repercussion Profile (DRP), Sickness Impact Profile, and WHOQol-BREF.  
40  
41  
42  
43  
44  
45  
46

47 We also checked citations of key articles in ISI Web of Science and reference lists. Studies  
48 reported only as abstracts were excluded. References were managed in an Endnote X3  
49 database.  
50  
51

### 52 ***Study selection***

53 We included prospective studies of consecutive, unselected patients representative of the  
54 primary total hip or knee replacement population. Studies reporting a specific implant or  
55  
56  
57  
58  
59  
60

1  
2  
3 component were eligible if the population studied was not clearly selected, i.e. the group was  
4 likely to be representative of the total joint replacement population.  
5

6  
7 Study designs excluded were: cross-sectional and retrospective studies; randomised  
8 controlled trials; and evaluations of specific technologies. Randomised controlled trials and  
9 many evaluations of new technologies comprise selected populations and furthermore it is  
10 outside the scope of this review to assess whether these reflect best clinical practice.  
11  
12

13  
14 We made an a priori decision to limit follow up to between 3 months and 5 years. In  
15 evaluating the effectiveness of primary total hip or knee replacement in reducing pain from  
16 osteoarthritis we are concerned with outcomes when recovery can be considered maximal  
17 [14] and not later issues of joint loosening and revision.[20]  
18  
19

20  
21 Study titles, abstracts and, where necessary, full articles were checked independently for  
22 eligibility by two researchers experienced in systematic reviews (ADB) and rheumatology  
23 (PD). Disagreements were resolved by discussion. Validity of the database was confirmed by  
24 checking against reference lists provided by local experienced researchers in orthopaedic  
25 outcomes.  
26  
27  
28

29  
30 While we recognise that studies may include patients with other joint replacement surgery,  
31 we excluded studies specifically describing outcomes of revision operations and partial joint  
32 replacements (e.g. unicompartmental or patellofemoral knee replacement, and hip  
33 resurfacing).  
34  
35

### 36 37 ***Data extraction***

38  
39 The pain measure relating to the operated hip or knee was considered in the review. No  
40 attempt was made to contact authors of studies that did not have appropriate data. In previous  
41 reviews we have conducted only a minority of authors contacted have provided additional  
42 data for analyses. Although contact with authors is a well recognised approach in systematic  
43 reviews,[21] a survey of review authors indicated that many systematic reviewers do not do  
44 so because of poor response rates and variability in the quality of information collected this  
45 way.[22] Authors of studies with appropriate data but with specific missing information were  
46 contacted.  
47  
48  
49  
50  
51

52  
53 Data from eligible articles was recorded on an Excel spreadsheet by one reviewer (ADB) and  
54 checked against original articles by a second (VW). Data was extracted on: indication (all or  
55 majority of patients with osteoarthritis), pain outcome, baseline dates, country, study design,  
56 how group selected, age, number of patients recruited, number who died and the number lost  
57  
58  
59  
60

1  
2  
3 to follow up. We recorded the number of people at follow up with no pain or mild pain,  
4 moderate or severe pain (or with little improvement in pain from pre-operative), revision or  
5 dislocations or deep infection, and contralateral or other joint replacement or treatment for  
6 fracture.  
7  
8  
9

### 10 *Data synthesis and analysis*

11  
12 As studies reported different pain measures, we summarised pain outcomes in a way that was  
13 applicable to all measures. The proportions of people with different severities of pain were  
14 summarised as 'favourable', 'unfavourable' or 'uncertain' outcomes. Favourable outcome  
15 includes people with no pain or mild pain at follow up, while unfavourable outcome includes  
16 those with moderate to severe pain or for whom surgery had not relieved pain. The uncertain  
17 outcome includes all patients for whom we cannot be sure of their pain levels at follow up.  
18 These include patients who died, had revision surgery, contra-lateral surgery or dislocation  
19 and were not followed up with questionnaires, and those lost to follow up. We also included  
20 as uncertain those patients with a degree of reported pain which we could not classify as a  
21 favourable or unfavourable outcome.  
22  
23  
24  
25  
26  
27  
28

### 29 *Quality assessment*

30  
31 Only studies with unselected patients and complete reporting of losses to follow up were  
32 included. To describe the quality of studies we used the features of the Cochrane risk of bias  
33 table applicable to longitudinal studies.[21] Specifically these were: blind outcome  
34 assessment (self-completed patient reported outcome measure); incompleteness of outcome  
35 data collection (losses to follow up low <10%, moderate 10-20% or high >20%); and other  
36 sources of bias (representativeness of study population).  
37  
38  
39  
40  
41

### 42 **Results**

43  
44 The review process is summarised in Figure 1. Searches identified 1308 studies reporting  
45 patient-centred outcomes in patients with osteoarthritis. Of these, 115 studies included data  
46 on patient-centred pain outcomes in representative population samples studied prospectively  
47 for between 3 months and 5 years. Fourteen articles describing 17 cohorts (6 in hip and 11 in  
48 knee patients) presented results classifiable as proportions of people with different extents of  
49 pain at follow up. The main reasons for exclusion at this stage were lack of a pain outcome  
50 separate from an overall outcome score or the presentation of results as means only.  
51  
52  
53  
54

55  
56 Patient and study characteristics and outcomes are shown in Table 1. The proportions of  
57 people with different pain outcomes are summarised in Figure 2.  
58  
59  
60

## **Total hip replacement**

Systematic searches identified six studies from Canada, Denmark, Spain, Sweden, UK and USA including a total of 13,031 patients. Pain outcome measures were based on the WOMAC pain scale or authors' own methods. The measures used and the definition of unfavourable pain outcome are summarised for each study in Appendix 3.

### ***Study quality***

Issues relating to study quality are summarised in Appendix 4.

Studies described data collected prospectively in consecutive patients with primary total hip replacement. One study was in patients recruited from a national joint registry.[23] Two studies were in multiple centres [24 25] and three were studies in single centres.[26-28] Cohorts were generally similar with regard to patient age (range of means or medians 65.0-73.0 years) and sex (range of percentage female 48.3-63%) , and the indication was osteoarthritis in 87% of patients or more when specified. One national registry study from Denmark included only patients treated with a postero-lateral surgical approach.[23] However the posterior or lateral approach was used in 99% of patients according to another publication from the Danish Hip Registry.[29] Otherwise no inclusion or exclusion criteria suggested that the patients studies would not have been representative of the overall total hip replacement population. All studies used self-completed patient reported outcome measures. Losses to follow up ranged from 5.8 to 47.6%. We considered two markers of better representativeness as indicators of study quality: studies with multiple compared with single centres, and by lower losses to follow up.

### ***WOMAC pain***

Jones and colleagues followed up a cohort of 242 consecutive patients receiving total hip replacement in a health region six months after total hip replacement.[24] Patients undergoing hemiarthroplasty, revisions and emergency surgery were excluded. Losses to follow up were low at under 5.8%. Results were presented combined with a total knee replacement cohort and with the consent of the author we assumed that equal proportions of hip and knee patients were followed up. The WOMAC outcome used to define a poor pain outcome was an improvement of less than 10 points on the 100 point pain scale (representing a gain of at least 60% of the baseline standard deviation). We estimate the proportion of patients with no detectable clinical improvement was 8.3% (uncertain 5.8%).



1  
2  
3 Quintana and colleagues followed up a cohort of 784 patients on waiting lists for total hip  
4 replacement at seven teaching hospitals.[30] WOMAC questionnaires were completed six  
5 months after surgery by 584 patients. Losses to follow up were high at 25.5%. The authors  
6 identified 24.55 points on the 100 point WOMAC pain scale as representing a minimal  
7 clinically important difference. No improvement in pain greater than the minimal clinically  
8 important difference was observed in 16.3% of patients (uncertain 25.5%).The other two  
9 studies reporting WOMAC pain outcomes after total hip replacement were conducted in  
10 single centres.

11  
12 Several reports described the cohort of Nilsson and colleagues. The prospective study with  
13 219 consecutive patients with primary unilateral THR represented the most complete  
14 report.[26] Losses to follow up were low at about 5.9%. Of the 219 patients, only those  
15 recruited in the later stages of the study had baseline pain assessed with the WOMAC  
16 questionnaire. Thus the detectable clinical improvement outcome of 10 points on the 100  
17 point scale was available on 92 patients. The authors reported that there were no differences  
18 between age and sex between these 92 patients and those without WOMAC data. We  
19 estimated overall numbers of patients with favourable and unfavourable outcomes on the  
20 basis of these 92 patients. Approximately 20.5% of patients had no detectable clinical  
21 improvement after a mean of 43 months (uncertain 9.6%).

22  
23 In the study of Wylde and colleagues, 1401 consecutive patients with total hip replacement  
24 were followed prospectively for a median of 41 months.[28] In a postal survey losses to  
25 follow up were high at 47.6%. Moderate or severe persistent pain, indicated by a WOMAC  
26 score of 0–75 points on the 100 point scale, lasting 3 months or more, was reported by 8.1%  
27 of patients (uncertain 52.7%).

#### 28 *Authors own pain measure*

29  
30 In the study of Nikolajson et al., 1231 patients with primary total hip replacement recorded in  
31 a national joint registry were followed up by postal questionnaire at 12–18 months.[23]  
32 Losses to follow up were low at 5.9%. Pain from the operated hip (validated by pain  
33 drawings) with moderate to very severe impact on daily life was reported by 10.3% of  
34 patients (uncertain 28.4%).

35  
36 Singh and Lewallen followed up a single centre population with a postal questionnaire.[27]  
37 Of 9154 patients with total hip replacement, 5707 provided information at 24 months with  
38  
39  
40  
41  
42

1  
2  
3 high loss to follow up of 37.7%. Moderate or severe pain in the operated hip was reported by  
4 4.8% of patients (uncertain 37.7%).  
5  
6

### 7 **Total knee replacement**

8  
9 Searches identified eleven studies conducted in Canada, Finland, Spain, Sweden, UK and  
10 USA reporting appropriate pain outcomes after total knee replacement. Studies included a  
11 total of 12,800 patients. Pain outcome measures were based on the WOMAC and KOOS pain  
12 scales, the Oxford knee score pain dimension or VAS pain scales. The measures used and the  
13 definition of unfavourable pain outcome are summarised for each study in Appendix 3.  
14  
15

### 16 **Study quality**

17  
18 Issues relating to study quality are summarised in Appendix 4.  
19

20  
21 Studies described data collected prospectively in patients with primary total knee  
22 replacement. One study was in patients recruited from a national joint registry.[31] Two  
23 studies were in patients from multiple centres,[24 30] six studies were in patients treated at a  
24 single centre,[32] and one study reported all patients operated on by one surgeon.[33]  
25 Cohorts were generally similar with regard to patient age (range of means or medians 66-76  
26 years) and sex (range of percentage female 54-86%), and the indication was osteoarthritis in  
27 94% of patients or more when specified. In one study patients were identified before surgery  
28 but no other further details of recruitment centre were reported.[34] Although one study  
29 limited inclusion of patients to those aged 50 years and older [34] and another followed up  
30 patients operated on by experienced surgeons only, study inclusion and exclusion criteria  
31 suggested that all studies were likely to be representative of the general total knee  
32 replacement population. With the exception of one study which used exclusively telephone  
33 interview, all studies assessed pain at follow up using self-completed questionnaires. All  
34 assessed pain using patient reported outcome measures. Losses to follow up ranged from 0%  
35 to 43.5 %.  
36  
37

### 38 **WOMAC pain**

39  
40 In addition to their study in hip replacement patients, Jones and colleagues followed up a  
41 cohort of 292 consecutive patients 6 months after total knee replacement.[24] Patients  
42 receiving hemiarthroplasty, revisions and emergency surgery were excluded. Losses to follow  
43 up were low at 5.8%. Assuming-As previously described, assuming equal proportions  
44 followed up we estimate that a detectable clinical improvement of less than 10/100 points on  
45  
46  
47  
48  
49  
50  
51  
52  
53  
54  
55  
56  
57  
58  
59  
60

1  
2  
3 the WOMAC pain scale (representing a gain of at least 60% of the baseline standard  
4 deviation) was reported by 18.5% (uncertain 5.5%).

5  
6 Quintana and colleagues followed up 792 consecutive patients from seven hospitals who  
7 received total knee replacement.[30] At 6 month follow up, WOMAC questionnaires were  
8 completed by 601 patients. Losses to follow up were high at 24.1%. No improvement in pain  
9 greater than the minimal clinically important difference (22.6/100) was observed in 25.1% of  
10 patients (uncertain 24.1%).

11  
12 Núñez and colleagues followed up a group of 88 consecutive primary total knee replacement  
13 patients.[35] Only 5.0% of patients were lost to follow up. At 36 months, 8.0% of patients  
14 (uncertain 23.9%) had no improvement in WOMAC pain scores.

15  
16 After total knee replacement surgery, a cohort of 68 patients was followed up prospectively  
17 by Stephens and colleagues.[34] Losses to follow up were low at 7.4%. At six months, 16.2%  
18 of patients (uncertain 7.4%) had no change or increased WOMAC pain compared with before  
19 surgery.

20  
21 Czurda and colleagues followed up 411 consecutive patients after computer-assisted or  
22 conventional primary knee replacement at a mean of 26 months.[32] Painful knees, defined  
23 as moderate pain or worse in any of the WOMAC pain questions, were reported by 13.9% of  
24 patients (uncertain 19.7%). Losses to follow up were moderate at 13.4%.

25  
26 A cohort of 1394 consecutive total knee replacement patients were followed up prospectively  
27 by Wylde and colleagues for a median of 28 months.[28] In a postal survey, moderate or  
28 severe persistent pain, indicated by a WOMAC pain score of 0–75 points on the 100 point  
29 scale, lasting 3 months or more was reported by 14.3% of patients (uncertain 54.7%).

30  
31 However, losses to follow up were high at 45.3%.

### 32 ***KOOS pain***

33  
34 From a postal survey of patients waiting for primary total knee replacement, Nilsson and  
35 colleagues followed 102 patients prospectively.[36] Losses to follow up were moderate at  
36 12.7%. At 60 months, 26.5% of patients (uncertain 27.5%) experienced similar or more pain  
37 than before surgery.

### 38 ***Oxford knee score pain dimension***

39  
40 Baker and colleagues followed up 9417 patients with primary total knee replacement from a  
41 joint registry by postal questionnaire at least 12 months after surgery.[31] Losses to follow up  
42

1  
2  
3 were moderate at 14.9%. Persistent knee pain was reported by 16.8% of patients (uncertain  
4 14.9%).

### 7 *VAS pain*

8  
9 Lundblad and colleagues followed up 69 total knee replacement patients for 18 months.[37]  
10 Losses to follow up were moderate at 10.1%. Interpreting VAS responses, the authors  
11 reported pain at rest and on movement in 21.7% of patients (uncertain 47.8%).

12  
13 Vuorenmaa and colleagues followed up 51 total knee replacement patients prospectively at 3  
14 months.[38] Losses to follow up were moderate at 11.8%. Moderate or severe pain, defined  
15 as >30 on a 100mm VAS pain scale, was reported in 17.6% of patients (uncertain 15.7%).

16  
17 In the study of Brander and colleagues, 116 consecutive patients treated with primary total  
18 knee replacement by a single surgeon were followed prospectively for up to 12 months.[33]  
19 Using a VAS scale, the authors identified significant knee pain (defined as a VAS score of  
20 >40) in 12.9% of patients (uncertain 2.6%). No patients were lost to follow up.

## 26 **Overview**

### 27 *Total hip replacement*

28  
29 Overall, an unfavourable pain outcome was seen in at least 4.8% and up to 20.5% of patients  
30 after hip replacement (Figure 2). However these are likely to be underestimates as we do not  
31 have information on the outcomes in between 5.8 and 52.7% of patients.

32  
33 As indicators of studies with more representative populations, the three studies in multiple  
34 centres reported an unfavourable pain outcome relating to the operated hip in 8.3%, 10.3%  
35 and 16.3% of patients followed up. Studies with low losses to follow up reported an  
36 unfavourable pain outcome in 8.3%, 10.3% and 20.5% of patients. Even considering studies  
37 with some degree of outcome consistency involving minimal clinically important differences  
38 the range of unfavourable pain outcome was wide with at least 8.1% and up to 20.5% of  
39 patients affected.

40  
41 Applying the conservative assumption that an equal proportion of patients with missing data  
42 had an unfavourable pain outcome, we estimate that at least 7 to 23% of patients experienced  
43 long-term pain after hip replacement. In three higher quality studies as judged by  
44 representativeness, this would reflect an unfavourable pain outcome in 9%, 13% and 20% of  
45 patients, and in three studies with low losses to follow up in 9%, 13% and 23% of patients.

Two studies with both indicators of best study quality suggested that 9% to 13% of patients had an unfavourable pain outcome after total hip replacement.

### ***Total knee replacement***

After knee replacement, an unfavourable pain outcome was seen in at least 8.0% and up to 26.5% of patients (Figure 2). Three studies followed up of populations from multiple centres and unfavourable pain outcomes relating to the operated knee were reported in 16.8%, 18.5% and 25.1% of patients. In four studies with low losses to follow up, an unfavourable pain outcome was reported in 8.0%, 12.9%, 16.2%, and 18.5% of patients. Considering studies with some degree of outcome consistency the range of unfavourable pain outcome was wide with at least 14.3% and up to 25.1% of patients affected.

These are likely to be underestimates as we do not have outcome information on between 2.6 and 54.7% of patients. Assuming conservatively that the patients with missing data had similar pain outcomes, studies suggested that at least 10 to 34% of patients experience long-term pain after knee replacement. Applying this assumption in the higher quality studies with potentially more representative populations, at least 19%, 20% and 31% of patients had an unfavourable pain outcome after total knee replacement. In four studies with low losses to follow up 10%, 13%, 17% and 20% of patients reported an unfavourable pain outcome at follow up. In one study conducted in multiple centres with low losses to follow up, 20% of patients reported an unfavourable pain outcome at follow up.

### **Discussion**

These data show that many people with a total hip or knee replacement complain of pain in the operated joint in the early years after surgery. This was particularly evident after total knee replacement.

Although we have interpreted pain outcomes as favourable, unfavourable or uncertain we do not believe the data justify combination to provide summary values. In the studies identified in our review, several different outcome measures were reported, and in studies with similar outcomes different methods of analysis were used. Without specific information on responsiveness and correlation between methods, an important additional source of heterogeneity may be introduced.[39]

Previous reviews have looked at functional and health-related quality of life after joint replacement. Kane and colleagues reported functional outcomes after total knee replacement in a literature review of 62 studies published between 1995 and 2003.[40] They concluded

1  
2  
3 that knee replacement leads to improved function as shown by large effect sizes in studies,  
4 but that larger benefits were perceived by physicians than experienced by patients. Ethgen  
5 and colleagues identified 74 prospective cohort studies published between 1980 and 2003 that  
6 included quality of life outcomes.[41] The authors highlighted the value of health related  
7 quality of life data in improving management of patients undergoing hip or knee replacement.  
8 They concluded that total hip and knee arthroplasties were “quite effective” in improving  
9 health related quality of life dimensions. In a large European cohort, Judge and colleagues  
10 concluded that 14–36% of patients had no symptomatic improvement 12 months after total  
11 hip replacement.[8]

12  
13  
14  
15  
16  
17  
18  
19  
20  
21  
22  
23  
24  
25  
26  
27  
28  
29  
30  
31  
32  
33  
34  
35  
36  
37  
38  
39  
40  
41  
42  
43  
44  
45  
46  
47  
48  
49  
50  
51  
52  
53  
54  
55  
56  
57  
58  
59  
60  
The results we present are consistent with those reporting satisfaction as an outcome. For  
example Bourne et al. reported satisfaction with pain relief in a study in knee replacement  
patients.[42] Satisfaction with pain relief ranged from 72% for going up or down stairs to  
85% for walking on a flat surface.

In systematic reviews, publication bias is important in assessing the validity of the results. In  
this review we identified 95 studies where the proportion of people with pain at follow up  
could have been estimated by authors with access to original data. In previous reviews that  
we have conducted, replies to requests for additional data have been patchy and we chose not  
to pursue this approach. Nevertheless, we encourage study authors to perform and publish  
appropriate analyses of their data. Similarly, a wealth of patient-centred outcome data is now  
collected routinely and merits wide dissemination.

The majority of studies included in our review reported outcomes of patients after total joint  
replacement. A few studies followed up patients listed for total joint replacement and it is  
possible that these studies included patients who subsequently received other surgical  
treatments including unicompartmental knee replacement or hip resurfacing.

In this review we were unable to apply a standard definition of pain severity at follow up and  
the need to improve assessment and measurement of musculoskeletal pain in the clinical  
setting is recognised.[43] In the articles we included there were several interpretations of pain  
as an unfavourable outcome. These included: lack of improvement in postoperative pain  
scores, pain at rest, persistent pain, night pain, and lack of detectable clinical improvement.

Although having a standard outcome has advantages, our more encompassing approach  
allows us to include studies from wide time periods and different countries with different  
favoured methods for outcome assessment. However, the different outcome measures and

1  
2  
3 small number of studies precluded exploration of sources of heterogeneity relating to patient  
4 characteristics, surgical method, peri-operative care and rehabilitation.  
5

6  
7 In the studies included in this review the measures may not fully describe chronic post-  
8 surgical pain. Measures that focus on pain during specific activities may not reflect the  
9 intermittent and intense pain that has the greatest impact on quality of life.[44] Another issue  
10 in considering pain as an outcome after replacement is that no account is made for the effect  
11 of analgesics and assistive aids on the reporting of pain. Self-reported analgesic use is high,  
12 with 40% of men and 58% of women taking pain medications after knee replacement,[45]  
13 and 30% of patients taking analgesics daily after hip replacement because of pain in their  
14 replaced joint.[23] We used disease specific instruments focusing on the operated joint rather  
15 than generic measures of pain. In the replacement population there are likely to be high levels  
16 of morbidity due to osteoarthritis and other conditions common in old age.  
17  
18  
19  
20  
21  
22  
23

24 Our data suggests that many hip and knee replacement patients are likely to be in pain at the  
25 time when recovery from surgery should be optimal. In a cohort of 194 patients following hip  
26 or knee replacement surgery, pain was seen to achieve its lowest level by three months after  
27 surgery.[14]  
28  
29  
30

31 While acknowledging probable under-estimates of the extent of pain after surgery reported in  
32 the literature, we should recognise the effectiveness of replacement for many. However, a  
33 significant proportion of people have painful joints despite surgery and strategies to improve  
34 outcomes merit research.  
35  
36  
37

38 Many determinants of long-term outcome after hip and knee replacement are described and  
39 interventions evaluated. Better general health, physical, emotional and social function,  
40 motivation and self-efficacy, and lower levels of pain before surgery and during the  
41 rehabilitation period are associated with improved short and medium term outcomes.[26 46-  
42 48] However the evidence for benefit of pre-surgical and rehabilitation interventions is  
43 limited, particularly as few studies have been adequately powered or of sufficient  
44 duration.[49-53]  
45  
46  
47  
48  
49

50 Another approach is the identification of patients before surgery who are at risk of a poor  
51 pain outcome. Kalkman et al. developed a multivariable model to predict short term pain after  
52 surgical procedures.[54] Use of a predictive model based on pre- or post-surgical factors  
53 might allow targeting of additional pain management and rehabilitation to patients likely to  
54 benefit.  
55  
56  
57  
58  
59  
60

1  
2  
3 In conclusion, persistent pain in a hip or knee joint that has been replaced is not uncommon.  
4 For patients to participate in decisions about their care it is important that they are informed  
5 and aware of both the likely benefits of surgery and the possibility of a less favourable  
6 outcome. With this knowledge they may contribute more fully to the replacement process  
7 including preparatory strategies and long term rehabilitation. It is clear that the current move  
8 to a greater interest in patient-centred outcomes after replacement is necessary, and that there  
9 is an urgent need to address the determinants of good and bad outcomes.  
10  
11  
12  
13

### 14 **Author contributions**

15 PD conceived the review

16 All authors contributed to the design of the review

17 ADB identified and acquired reports of studies

18 ADB and PD checked studies for eligibility

19 ADB and VW extracted and checked data

20 ADB analysed and interpreted the data

21 ADB drafted the manuscript

22 All authors contributed to the final version of the manuscript

23 All authors contributed to revision of the manuscript

24 All authors approved the final version of the manuscript

### 25 **Competing interests**

26 No financial support or other benefits have been received by any of the authors that could  
27 create a potential conflict of interest with regard to the work.

### 28 **Funding**

29 This article outlines independent research commissioned by the National Institute for Health  
30 Research (NIHR) under its Programme Grants for Applied Research funding scheme (RP-  
31 PG-0407-10070). The views expressed are those of the authors and not necessarily those of  
32 the NHS, the NIHR or the Department of Health.  
33  
34  
35  
36  
37  
38  
39  
40  
41  
42  
43  
44



Table 1. Studies of total hip or knee replacement reporting proportion of patients with pain at follow up

| Author                     | Indication                                                                                                  | Follow up                                                                                                                  | Pain outcome measure                                                                      | Number of patients with:                                                                            |                                                               |                                                                                                |
|----------------------------|-------------------------------------------------------------------------------------------------------------|----------------------------------------------------------------------------------------------------------------------------|-------------------------------------------------------------------------------------------|-----------------------------------------------------------------------------------------------------|---------------------------------------------------------------|------------------------------------------------------------------------------------------------|
|                            |                                                                                                             |                                                                                                                            |                                                                                           | Favourable outcome                                                                                  | Uncertain outcome                                             | Unfavourable outcome                                                                           |
| Country                    | Population                                                                                                  | Study design                                                                                                               |                                                                                           |                                                                                                     |                                                               |                                                                                                |
| Date of baseline           | Age                                                                                                         | Losses to follow up                                                                                                        |                                                                                           |                                                                                                     |                                                               |                                                                                                |
| <i>Hip replacement</i>     |                                                                                                             |                                                                                                                            |                                                                                           |                                                                                                     |                                                               |                                                                                                |
| Nikolajson et al. 2006[23] | Primary THR, Degenerative hip arthritis                                                                     | 12–18 month follow up                                                                                                      | Authors’ own scale of presence of hip pain and impact on daily life                       | 754 (hip pain not present)                                                                          | 4 died                                                        | 127 (pain with moderate, severe or very severe impact on daily life)                           |
| Denmark                    | N=1231 questionnaire follow up of consecutive patients                                                      | Joint registry                                                                                                             |                                                                                           |                                                                                                     | 117 lost to follow up                                         |                                                                                                |
| 2003                       | Mean age 71.6 years (SD 8.7)                                                                                | 5.9% lost to follow up                                                                                                     |                                                                                           |                                                                                                     | 62 bilateral or further operation                             |                                                                                                |
|                            |                                                                                                             |                                                                                                                            |                                                                                           |                                                                                                     | 167 hip pain still present with no/ mild impact on daily life |                                                                                                |
| Jones et al. 2000[24]      | Primary THR, 94% OA                                                                                         | 6 month follow up                                                                                                          | WOMAC pain                                                                                | 208 (no pain/ mild pain defined as more than a 10-point gain on the 100 point WOMAC pain dimension) | 14 lost to follow up (estimated)                              | 20 (moderate/ severe pain defined as a gain of less than 10 points on the 100 point WOMAC pain |
| Canada                     | N=242 consecutive patients (includes estimated lost to follow up based on equal proportions hip/ knee lost) | Prospective                                                                                                                | Losses to follow up estimated proportionately as not reported for hip and knee separately |                                                                                                     |                                                               |                                                                                                |
| 1995–1997                  | Mean age 68.2 years (SD 11.1)                                                                               | 5.8% lost to follow up or died (Losses to follow up estimated proportionately as not reported for hip and knee separately) |                                                                                           |                                                                                                     |                                                               |                                                                                                |

|                                                   |                                                                                                                                                                 |                                                                                                               |                                                                                                  |                                                                                                           |                                | dimension)                                                                                                   |
|---------------------------------------------------|-----------------------------------------------------------------------------------------------------------------------------------------------------------------|---------------------------------------------------------------------------------------------------------------|--------------------------------------------------------------------------------------------------|-----------------------------------------------------------------------------------------------------------|--------------------------------|--------------------------------------------------------------------------------------------------------------|
| Quintana et al.<br>2006[30]<br>Spain<br>1999–2000 | THR, OA<br>N=784 consecutive patients willing to participate and with complete pre-surgical data<br>Mean age 69.1 years                                         | 6 month follow up<br>Prospective<br>25.5% lost to follow up                                                   | WOMAC pain                                                                                       | 456 (patients reporting improvement in pain greater than minimal clinical important difference 24.55/100) | 200 lost to follow up          | 128 (patients reporting no improvement in pain greater than minimal clinical important difference 24.55/100) |
| Nilsson et al.<br>2003[26]<br>Sweden<br>1995–1998 | Primary unilateral THR, OA<br>N=219 consecutive patients with 2 surgical methods. For proportion with pain at follow up N=92<br>Mean age 71 years (range 50–92) | Mean 43 month follow up<br>Prospective<br>5.9% lost to follow up                                              | WOMAC pain<br>Favourable/unfavourable estimates based on extrapolation of partial follow up      | 153 (Pain improved by more than 10/100 units reflecting detectable clinical improvement)                  | 8 died<br>13 lost to follow up | 45 (Pain improved by less than 10/100 units reflecting no detectable clinical improvement)                   |
| Singh & Lewallen<br>2010[27]<br>USA<br>1993–2005  | THR, 87% OA<br>N=9154 consecutive patients from joint registry sent postal questionnaire<br>Mean age of patients followed up 65.0 years (SD 13)                 | 24 month follow up (also 60 month with greater losses to follow up)<br>Prospective<br>37.7% lost to follow up | Single question: How much pain do you have in your operated hip? None, mild, moderate or severe. | 5272 (None or mild pain)                                                                                  | 3447 lost to follow up         | 435 (moderate or severe pain)                                                                                |

|                                                 |                                                                                                                                                                    |                                                                                                                                            |                                                                                                         |                                                                                           |                                                |                                                                                                 |
|-------------------------------------------------|--------------------------------------------------------------------------------------------------------------------------------------------------------------------|--------------------------------------------------------------------------------------------------------------------------------------------|---------------------------------------------------------------------------------------------------------|-------------------------------------------------------------------------------------------|------------------------------------------------|-------------------------------------------------------------------------------------------------|
| Wylde et al.<br>2011[28]<br>UK<br>2004–2006     | THR, majority OA<br>N= 1401 consecutive patients<br>Median age 73 years (range 65–78)                                                                              | Median 41 month follow up (range 35–48)<br>Prospective with postal follow up<br>47.6% lost to follow up                                    | WOMAC pain                                                                                              | 818 (no pain for the past 3 months or mild persistent pain in replaced hip)               | 71 died<br>1 revision<br>667 lost to follow up | 114 (moderate or severe persistent pain for 3 months in replaced hip, WOMAC 0–75/100)           |
| <b><i>Knee replacement</i></b>                  |                                                                                                                                                                    |                                                                                                                                            |                                                                                                         |                                                                                           |                                                |                                                                                                 |
| Baker et al.<br>2007[31]<br>UK<br>2003          | Primary TKR, 96% OA<br>N=9417 questionnaire follow up of random sample of patients in joint registry<br>Mean age 70.7 years (range 25–98)                          | 12 month follow up or latest available<br>Prospective<br>14.9% lost to follow up                                                           | Oxford knee score pain dimension                                                                        | 6427 (did not report persistent knee pain)                                                | 1407 lost to follow up or died                 | 1583 (reported persistent knee pain)                                                            |
| Jones et al.<br>2000[24]<br>Canada<br>1995–1997 | Primary TKR, 94% OA<br>N=292 consecutive patients (includes estimated lost to follow up based on equal proportions hip/ knee lost)<br>Mean age 69.2 years (SD 9.2) | 6 month follow up<br>Prospective<br>5.5% lost to follow up or died (estimated proportionately as not reported for hip and knee separately) | WOMAC pain<br>Losses to follow up estimated proportionately as not reported for hip and knee separately | 222 (no pain/ mild pain defined as more than a 10-point gain on the WOMAC pain dimension) | 16 lost to follow up or died (estimated)       | 54 (moderate/ severe pain defined as a gain of less than 10 points on the WOMAC pain dimension) |
| Quintana et al.<br>2006[30]                     | TKR, OA<br>N=792 consecutive                                                                                                                                       | 6 month follow up                                                                                                                          | WOMAC pain                                                                                              | 402 (patients reporting)                                                                  | 191 lost to follow up                          | 199 (patients reporting no                                                                      |

|                                             |                                                                                                      |                                                                                 |                                         |                                                                                   |                                                                    |                                                                                   |
|---------------------------------------------|------------------------------------------------------------------------------------------------------|---------------------------------------------------------------------------------|-----------------------------------------|-----------------------------------------------------------------------------------|--------------------------------------------------------------------|-----------------------------------------------------------------------------------|
| Spain<br>1999–2000                          | patients willing to participate and with complete pre-surgical data<br>Mean age 71.9 years           | Prospective<br>24.1% lost to follow up                                          |                                         | improvement in pain greater than minimal clinical important difference (22.6/100) |                                                                    | improvement in pain greater than minimal clinical important difference (22.6/100) |
| Núñez et al. 2007[35]<br>Spain<br>2000–2001 | Primary TKR, OA<br>N=88 consecutive patients<br>Mean age 74.8 years (SD 5.6)                         | 36 month follow up<br>Prospective<br>8.0% lost to follow up                     | WOMAC pain                              | 60 (improvement in postoperative pain scores)                                     | 1 died<br>7 lost to follow up<br>13 contralateral or other surgery | 7 (no improvement in postoperative pain scores)                                   |
| Stephens 2002[34]<br>USA                    | TKR, OA<br>N=68 patients referred for knee replacement aged 50 years or older<br>Mean age 67.4 years | 6 month follow up<br>Prospective<br>7.4% lost to follow up                      | WOMAC                                   | 52 (decrease in pain)                                                             | 5 lost to follow up                                                | 11 (no change or increase in pain)                                                |
| Lundblad et al. 2008[37]<br>Sweden          | TKR, OA<br>N=69 patients scheduled for knee replacement<br>Mean age 68 years (range 40–80)           | 18 month follow up<br>Prospective<br>10.1% lost to follow up (including deaths) | VAS pain                                | 21 (no pain at rest or with movement)                                             | 7 lost to follow up or died<br>26 pain with movement               | 15 (pain at rest and movement)                                                    |
| Nilsson et al. 2009[36]<br>Sweden           | Primary TKR, OA<br>N=102 responders to postal survey on waiting                                      | 60 month follow up<br>Prospective<br>12.7% lost to follow up                    | KOOS pain compared with pre-operatively | 47 (much less or less pain than pre-                                              | 9 died<br>13 lost to follow up                                     | 27 (similar or more pain than pre-                                                |

|                                                |                                                                                                                                                                     |                                                                                                         |                                                                                                                            |                                                                                              |                                                                                              |                                                                                       |
|------------------------------------------------|---------------------------------------------------------------------------------------------------------------------------------------------------------------------|---------------------------------------------------------------------------------------------------------|----------------------------------------------------------------------------------------------------------------------------|----------------------------------------------------------------------------------------------|----------------------------------------------------------------------------------------------|---------------------------------------------------------------------------------------|
| 1999–2001                                      | list for knee replacement<br>Mean age 71 years (SD 8, range 51–86)                                                                                                  |                                                                                                         |                                                                                                                            | operatively)                                                                                 | 6 operated bilaterally                                                                       | operatively)                                                                          |
| Vuorenmaa 2008[38]<br>Finland                  | TKR, OA<br>N=51 patients referred for knee replacement<br>Mean age 70 (SD 5)                                                                                        | 3 month follow up<br>Prospective<br>11.8% lost to follow up                                             | VAS pain<br>Pain calculated from 20% followed up had moderate or severe pain (defined as score of >30 on a 100mm pain VAS) | 34 (none or mild pain)                                                                       | 1 died<br>6 lost to follow up<br>1 infection                                                 | 9 (moderate or severe pain)                                                           |
| Czurda et al. 2010[32]<br>Austria<br>2003–2005 | Primary TKR, OA<br>N=411 consecutive patients with computer assisted or conventional surgery with at least 18 months follow up<br>Mean age 75–76 years(range 45–96) | Mean 26 month follow up (range 18–42)<br>13.4% lost to follow up                                        | WOMAC pain                                                                                                                 | 273 (no report of painful knees – no moderate or worse response in any WOMAC pain dimension) | 2 died<br>55 lost to follow up<br>24 infection, trauma, re-operation, poor general condition | 57 (painful knees – moderate or worse response in any WOMAC pain dimension)           |
| Wylde et al. 2011[28]<br>UK<br>2004–2006       | TKR, majority OA<br>N= 1394 consecutive patients<br>Median age 73 (range 28–96)                                                                                     | Median 28 month follow up (range 14–43)<br>Prospective with postal follow up<br>45.3% lost to follow up | WOMAC pain                                                                                                                 | 433 (no pain for the past 3 months or mild persistent pain in replaced hip)                  | 62 died<br>4 revision<br>696 lost to follow up                                               | 199 (moderate or severe persistent pain for 3 months in replaced hip, WOMAC 0–75/100) |
| Brander et al.                                 | Primary TKR, 94% OA                                                                                                                                                 | 12 month follow up                                                                                      | VAS pain                                                                                                                   | 98 (no significant)                                                                          | 1 died                                                                                       | 15 (significant pain, VAS)                                                            |

|           |                                          |                      |                             |                           |               |
|-----------|------------------------------------------|----------------------|-----------------------------|---------------------------|---------------|
| 2003[33]  | N=116 consecutive patients (1 surgeon)   | Prospective          | pain, VAS score $\leq 40$ ) | 2 revision or dislocation | score $>40$ ) |
| USA       | Mean age 66 years (SD 10.5, range 36–85) | 0% lost to follow up |                             |                           |               |
| 1998–2000 |                                          |                      |                             |                           |               |

Studies ordered within hip and knee replacement groups by decreasing representativeness (multiple compared with single centre); and by increasing losses to follow up.

THR total hip replacement, TKR total knee replacement, OA osteoarthritis, WOMAC Western Ontario and McMaster Universities Arthritis Index, VAS

## References

- 1 National Joint Registry for England and Wales: 7th Annual Report. Hemel Hempstead: NJR Centre, 2010.
- 2 DeFrances CJ, Lucas CA, Buie VC, et al. 2006 National Hospital Discharge Survey. National health statistics reports; no 5. Hyattsville MD: National Center for Health Statistics, 2008.
- 3 Kurtz S, Ong K, Lau E, et al. Projections of primary and revision hip and knee arthroplasty in the United States from 2005 to 2030. *J Bone Joint Surg Am* 2007;**89-A**:780-85.
- 4 Ranawat CS, Atkinson RE, Salvati EA, et al. Conventional total hip arthroplasty for degenerative joint disease in patients between the ages of forty and sixty years. *J Bone Joint Surg Am* 1984;**66-A**:745-52.
- 5 Aamodt A, Nordsletten L, Havelin LI, et al. Documentation of hip prostheses used in Norway: A critical review of the literature from 1996-2000. *Acta Orthop Scand* 2004;**75**:663-76.
- 6 Ng CY, Ballantyne JA, Brenkel IJ. Quality of life and functional outcome after primary total hip replacement: A five-year follow-up. *J Bone Joint Surg Br* 2007;**89-B**:868-73.
- 7 Woolhead GM, Donovan JL, Dieppe PA. Outcomes of total knee replacement: a qualitative study. *Rheumatology* 2005;**44**:1032-37.
- 8 Judge A, Cooper C, Williams C, et al. Patient-reported outcomes one year after primary hip replacement in a European Collaborative Cohort. *Arthritis Care Res* 2010;**62**:480-88.
- 9 Bellamy N, Buchanan WW, Goldsmith CH, et al. Validation study of WOMAC: a health status instrument for measuring clinically important patient relevant outcomes to antirheumatic drug therapy in patients with osteoarthritis of the hip or knee. *J Rheumatol* 1988;**15**:1833-40.

1  
2  
3 10 Dreinhofer KE, Dieppe P, Sturmer T, et al. Indications for total hip replacement:  
4 comparison of assessments of orthopaedic surgeons and referring physicians. *Ann Rheum Dis*  
5 2006;**65**:1346-50.  
6  
7

8  
9 11 Jha AK, Orav EJ, Zheng J, et al. Patients' perception of hospital care in the United States.  
10 *NEJM* 2008;**359**:1921-31.  
11  
12

13  
14 12 Darzi A. High quality care for all: NHS next stage review final report. London:  
15 Department of Health, 2008.  
16  
17

18  
19 13 Guidance on the routine collection of Patient Reported Outcome Measures (PROMs).  
20 London: Department of Health, 2009.  
21  
22

23  
24 14 Bachmeier CJM, March LM, Cross MJ, et al. A comparison of outcomes in osteoarthritis  
25 patients undergoing total hip and knee replacement surgery. *Osteoarthritis Cart* 2001;**9**:137-  
26 46.  
27  
28

29  
30 15 Murray DW, Britton AR, Bulstrode CJ. Loss to follow-up matters. *J Bone Joint Surg Br*  
31 1997;**79-B**:254-7.  
32  
33

34  
35 16 Konig A, Schreiber B, Rader C, et al. A comparison of knee and function score of patients  
36 lost to follow-up with patients reattending a prospective total knee arthroplasty study. *Z*  
37 *Orthop Unfall* 1999;**137**:57-60.  
38  
39

40  
41 17 Kim J, Lonner JH, Nelson CL, et al. Response bias: effect on outcomes evaluation by mail  
42 surveys after total knee arthroplasty. *J Bone Joint Surg Am* 2004;**86-A**:15-21.  
43  
44

45  
46 18 Kwon S, Kang Y, Chang C, et al. Interpretations of the clinical outcomes of the  
47 nonresponders to mail surveys in patients after total knee arthroplasty. *J Arthroplasty*  
48 2010;**25**:133-37.  
49  
50

51  
52 19 Stroup DF, Berlin JA, Morton SC, et al. Meta-analysis of observational studies in  
53 epidemiology: a proposal for reporting. *JAMA* 2000;**283**:2008-12.  
54  
55  
56  
57  
58  
59  
60



1  
2  
3 20 Roberts VI, Esler CNA, Harper WM. A 15-year follow-up study of 4606 primary total  
4 knee replacements. *J Bone Joint Surg Br* 2007;**89-B**:1452-56.  
5

6  
7  
8 21 Higgins JPT, Green S. Cochrane Handbook for Systematic Reviews of Interventions  
9 Version 5.1.0 [Updated March 2011]: The Cochrane Collaboration, 2011.  
10

11  
12  
13 22 Mullan RJ, Flynn DN, Carlberg B, et al. Systematic reviewers commonly contact study  
14 authors but do so with limited rigor. *J Clin Epidemiol* 2009;**62**:138-42.  
15

16  
17  
18 23 Nikolajsen L, Brandsborg B, Lucht U, et al. Chronic pain following total hip arthroplasty:  
19 a nationwide questionnaire study. *Acta Anaesthesiol Scand* 2006;**50**:495-500.  
20

21  
22 24 Jones CA, Voaklander DC, Johnston DWC, et al. Health related quality of life outcomes  
23 after total hip and knee arthroplasties in a community based population. *J Rheumatol*  
24 2000;**27**:1745-52.  
25

26  
27  
28 25 Quintana JM, Escobar A, Bilbao A, et al. Responsiveness and clinically important  
29 differences for the WOMAC and SF-36 after hip joint replacement. *Osteoarthritis Cart*  
30 2005;**13**:1076-83.  
31

32  
33  
34  
35 26 Nilsson AK, Petersson IF, Roos EM, et al. Predictors of patient relevant outcome after  
36 total hip replacement for osteoarthritis: A prospective study. *Ann Rheum Dis* 2003;**62**:923-30.  
37

38  
39  
40 27 Singh J, Lewallen D. Predictors of pain and use of pain medications following primary  
41 Total Hip Arthroplasty (THA): 5,707 THAs at 2-years and 3,289 THAs at 5-years. *BMC*  
42 *Musculoskeletal Disord* 2010;**11**.  
43

44  
45  
46 28 Wylde V, Hewlett S, Learmonth ID, et al. Persistent pain after joint replacement:  
47 Prevalence, sensory qualities, and postoperative determinants. *Pain* 2011;**152**:566-72.  
48

49  
50  
51 29 Lucht U. The Danish Hip Arthroplasty Register. *Acta Orthop Scand* 2000;**71**:433-39.  
52

53  
54  
55 30 Quintana JM, Escobar A, Arostegui I, et al. Health-related quality of life and  
56 appropriateness of knee or hip joint replacement. *Arch Int Med* 2006;**166**:220-26.  
57

1  
2  
3 31 Baker PN, van der Meulen JH, Lewsey J, et al. The role of pain and function in  
4 determining patient satisfaction after total knee replacement. Data from the National Joint  
5 Registry for England and Wales. *J Bone Joint Surg Br* 2007;**89-B**:893-900.  
6  
7

8  
9  
10 32 Czurda T, Fennema P, Baumgartner M, et al. The association between component  
11 malalignment and post-operative pain following navigation-assisted total knee arthroplasty:  
12 results of a cohort/nested case-control study. *Knee Surg Sports Traumatol Arthrosc*  
13 2010;**18**:863-9.  
14  
15

16  
17  
18 33 Brander VA, Stulberg SD, Adams AD, et al. Predicting total knee replacement pain: a  
19 prospective, observational study. *Clinical Orthop Relat Res* 2003;**416**:27-36.  
20  
21

22  
23 34 Stephens MAP, Druley JA, Zautra AJ. Older adults' recovery from surgery for  
24 osteoarthritis of the knee: psychosocial resources and constraints as predictors of outcomes.  
25 *Health Psychol* 2002;**21**:377-83.  
26  
27

28  
29 35 Núñez M, Núñez E, del Val JL, et al. Health-related quality of life in patients with  
30 osteoarthritis after total knee replacement: Factors influencing outcomes at 36 months of  
31 follow-up. *Osteoarthritis Cart* 2007;**15**:1001-07.  
32  
33

34  
35 36 Nilsson AK, Toksvig-Larsen S, Roos EM. Knee arthroplasty: are patients' expectations  
36 fulfilled? A prospective study of pain and function in 102 patients with 5-year follow-up.  
37 *Acta Orthop* 2009;**80**:55-61.  
38  
39

40  
41 37 Lundblad H, Kricbergs A, Jansson KA. Prediction of persistent pain after total knee  
42 replacement for osteoarthritis. *J Bone Joint Surg Br* 2008;**90-B**:166-71.  
43  
44

45  
46 38 Vuorenmaa M, Ylinen J, Kiviranta I, et al. Changes in pain and physical function during  
47 waiting time and 3 months after knee joint arthroplasty. *J Rehabil Med* 2008;**40**:570-75.  
48  
49

50  
51 39 Puhan M, Soesilo I, Guyatt G, et al. Combining scores from different patient reported  
52 outcome measures in meta-analyses: when is it justified? *Health Qual Life Outcomes*  
53 2006;**4**:94.  
54  
55  
56  
57  
58  
59  
60

1  
2  
3 40 Kane RL, Saleh KJ, Wilt TJ, et al. The functional outcomes of total knee arthroplasty. *J*  
4 *Bone Joint Surg Am* 2005;**87-A**:1719-24.

5  
6  
7 41 Ethgen O, Bruyere O, Richy F, et al. Health-related quality of life in total hip and total  
8 knee arthroplasty: A qualitative and systematic review of the literature. *J Bone Joint Surg Am*  
9 2004;**86-A**:963-74.

10  
11  
12 42 Bourne R, Chesworth B, Davis A, et al. Patient satisfaction after total knee arthroplasty:  
13 Who is satisfied and who is not? *Clin Orthop Relat Res* 2010;**468**:57-63.

14  
15  
16 43 MacKichan F, Wyld V, Dieppe P. The Assessment of Musculoskeletal Pain in the  
17 Clinical Setting. *Rheum Dis Clin North Am* 2008;**34**:311-30.

18  
19  
20 44 Hawker GA, Stewart L, French MR, et al. Understanding the pain experience in hip and  
21 knee osteoarthritis - an OARSI/OMERACT initiative. *Osteoarthritis Cart* 2008;**16**:415-22.

22  
23  
24 45 Hawker G, Wright J, Coyte P, et al. Health-related quality of life after knee replacement.  
25 Results of the knee replacement patient outcomes research team study. *J Bone Joint Surg Am*  
26 1998;**80-A**:163-73.

27  
28  
29 46 Rolfson O, Dahlberg LE, Nilsson J-A, et al. Variables determining outcome in total hip  
30 replacement surgery. *J Bone Joint Surg Br* 2009;**91-B**:157-61.

31  
32  
33 47 Dohnke B, Knäuper B, Müller-Fahrnow W. Perceived self-efficacy gained from, and  
34 health effects of, a rehabilitation program after hip joint replacement. *Arthritis Care Res*  
35 2005;**53**:585-92.

36  
37  
38 48 Jones CA, Beaupre LA, Johnston DWC, et al. Total joint arthroplasties: Current concepts  
39 of patient outcomes after surgery. *Rheum Dis Clin North Am* 2007;**33**:71-86.

40  
41  
42 49 Ackerman IN, Bennell KL. Does pre-operative physiotherapy improve outcomes from  
43 lower limb joint replacement surgery? A systematic review. *Aust J Physiother* 2004;**50**:25-  
44 30.

1  
2  
3 50 McDonald S, Hetrick SE, Green S. Pre-operative education for hip or knee replacement.  
4 *Cochrane Database Syst Rev* 2004:CD003526.  
5  
6

7  
8 51 Minns Lowe CJ, Barker KL, Dewey M, et al. Effectiveness of physiotherapy exercise after  
9 knee arthroplasty for osteoarthritis: Systematic review and meta-analysis of randomised  
10 controlled trials. *BMJ* 2007;**335**:812-15.  
11  
12

13  
14 52 Minns Lowe C, Barker K, Dewey M, et al. Effectiveness of physiotherapy exercise  
15 following hip arthroplasty for osteoarthritis: A systematic review of clinical trials. *BMC*  
16 *Musculoskeletal Disord* 2009;**10**:1.  
17  
18

19  
20 53 Khan F, Ng L, Gonzalez S, et al. Multidisciplinary rehabilitation programmes following  
21 joint replacement at the hip and knee in chronic arthropathy. *Cochrane Database Syst Rev*  
22 2008:CD004957.  
23  
24

25  
26 54 Kalkman CJ, Visser K, Moen J, et al. Preoperative prediction of severe postoperative pain.  
27 *Pain* 2003;**105**:415-23.  
28  
29  
30  
31  
32  
33  
34  
35  
36  
37  
38  
39  
40  
41  
42  
43  
44  
45  
46  
47  
48  
49  
50  
51  
52  
53  
54  
55  
56  
57  
58  
59  
60

Figure 1. Systematic review flow diagram

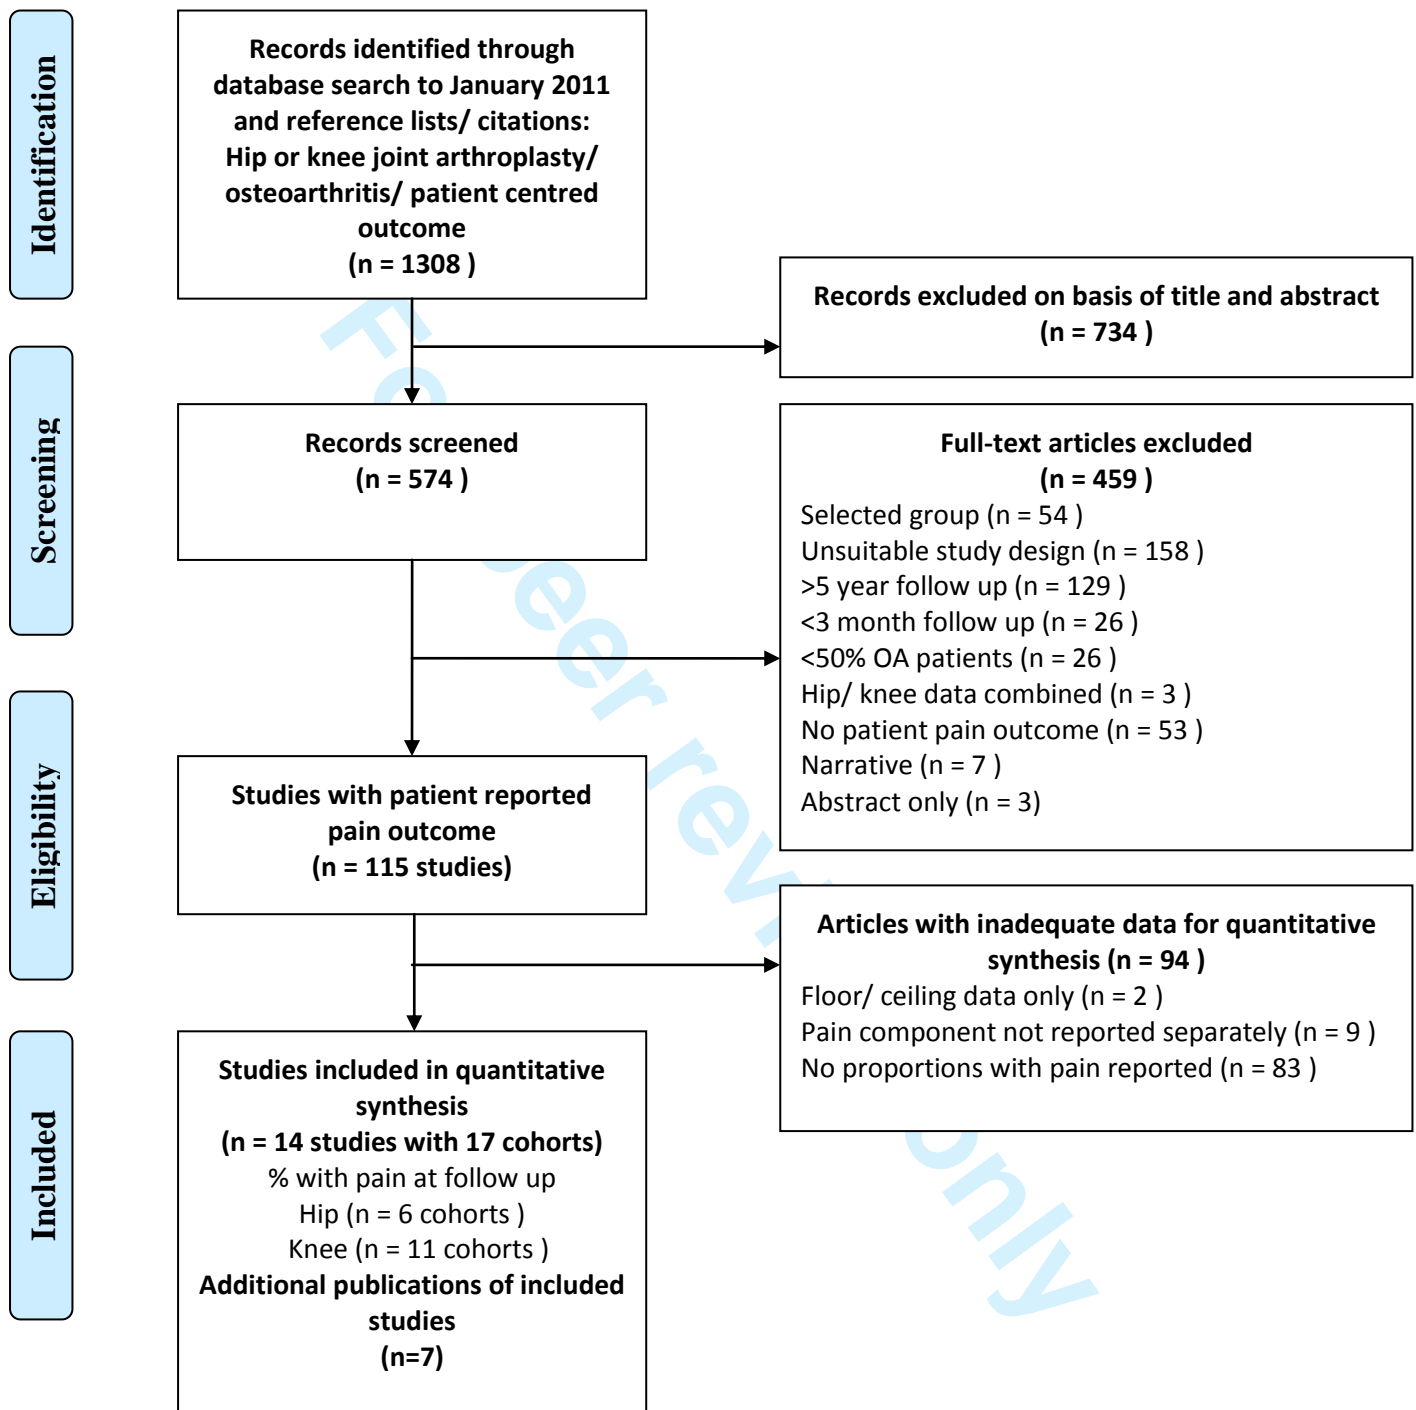

**Figure 2. Studies of hip or knee replacement reporting proportion of patients with pain at follow up**

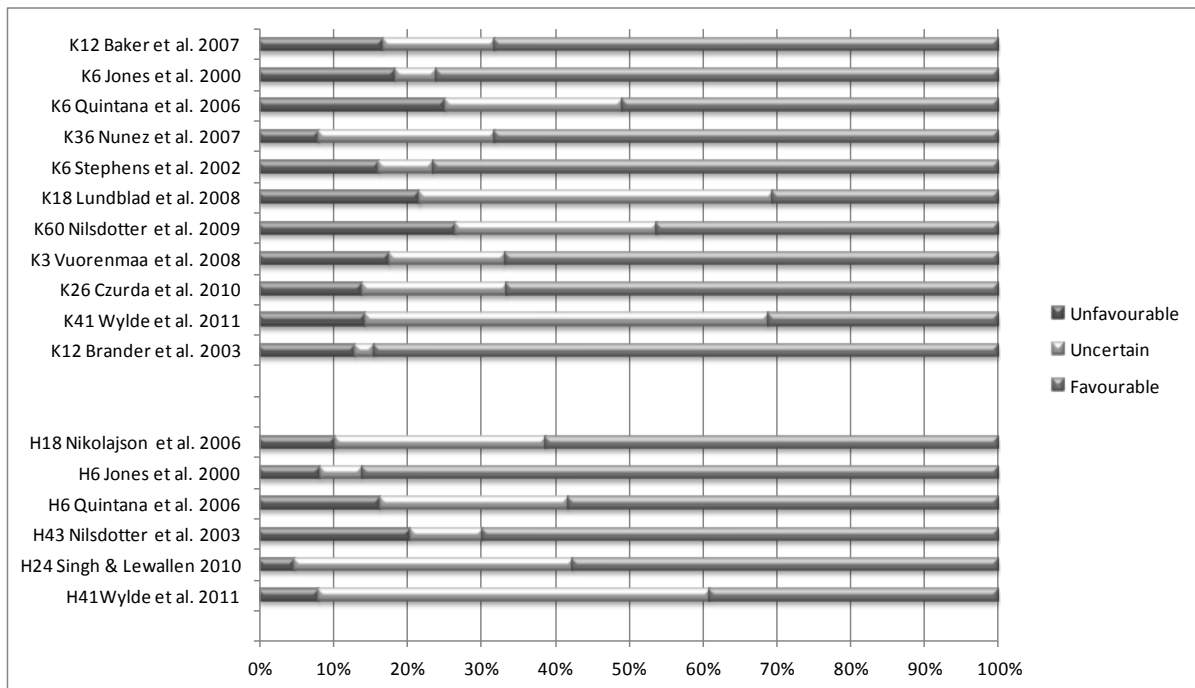

**Proportion of patients with outcome**

Preceding study author: H (hip) K (knee) and months (follow up)

Studies ordered within hip and knee replacement groups by decreasing representativeness (multiple compared with single centre); and by increasing losses to follow up.

1  
2  
3  
4  
5  
6  
7  
8  
9  
10  
11  
12  
13  
14  
15  
16  
17  
18  
19  
20  
21  
22  
23  
24  
25  
26  
27  
28  
29  
30  
31  
32  
33  
34  
35  
36  
37  
38  
39  
40  
41  
42  
43  
44  
45  
46  
47  
48  
49  
50  
51  
52  
53  
54  
55  
56  
57  
58  
59  
60

## Appendix 1. MOOSE Checklist

| <b>Reporting of background should include</b>                                           |                                                                                                                                                                                                                                                                                                                                                                                                                                                           |
|-----------------------------------------------------------------------------------------|-----------------------------------------------------------------------------------------------------------------------------------------------------------------------------------------------------------------------------------------------------------------------------------------------------------------------------------------------------------------------------------------------------------------------------------------------------------|
| Problem definition                                                                      | Introduction                                                                                                                                                                                                                                                                                                                                                                                                                                              |
| Hypothesis statement                                                                    | Introduction paragraph 4. "Reporting of pain outcomes in the orthopaedic literature frequently emphasises improvement in mean scores. To advise both patients and their healthcare professionals, it is important to have a clear understanding of the frequency and extent of pain following total hip or knee replacement. In the absence of appropriate clinical trials, the best way to explore this is the prospective study of unselected patients" |
| Description of study outcome(s)                                                         | Background paragraph 4<br>Methods/ Data sources and searches: disease specific patient reported outcome measures described<br>Data synthesis and analysis                                                                                                                                                                                                                                                                                                 |
| Type of exposure or intervention used                                                   | Background. Total hip or knee replacement                                                                                                                                                                                                                                                                                                                                                                                                                 |
| Type of study designs used                                                              | Methods/ Study selection. Prospective studies in consecutive/ unselected populations                                                                                                                                                                                                                                                                                                                                                                      |
| Study population                                                                        | Methods/ Study selection. Prospective studies in consecutive/ unselected populations                                                                                                                                                                                                                                                                                                                                                                      |
| <b>Reporting of search strategy should include</b>                                      |                                                                                                                                                                                                                                                                                                                                                                                                                                                           |
| Qualifications of searchers (eg, librarians and investigators)                          | Methods/ Study selection. Researchers experienced in systematic reviews and rheumatology                                                                                                                                                                                                                                                                                                                                                                  |
| Search strategy, including time period included in the synthesis and keywords           | Methods/ Data sources and searches, and Appendix 2                                                                                                                                                                                                                                                                                                                                                                                                        |
| Effort to include all available studies, including contact with authors                 | Methods/ Data extraction and Quality assessment. We did not contact authors. Potentially, data is available not just from published studies with mean pain outcome scores. It is also available as routinely collected data. We included only published studies in representative populations with appropriate outcome data. Also considered in Discussion Methods/ Study selection.                                                                      |
| Databases and registries searched                                                       | Methods/ Data sources and searches                                                                                                                                                                                                                                                                                                                                                                                                                        |
| Search software used, name and version, including special features used (eg, explosion) | Methods/ Data sources and searches.                                                                                                                                                                                                                                                                                                                                                                                                                       |
| Use of hand searching (eg, reference lists of obtained articles)                        | Methods/ Data sources and searches.                                                                                                                                                                                                                                                                                                                                                                                                                       |
| List of citations located and those excluded,                                           | PRISMA style flow diagram shown in                                                                                                                                                                                                                                                                                                                                                                                                                        |

|                                                                                                                                            |                                                                                                                                                                                                                                                                                                                                                                                                                                                                                                                                                                                            |
|--------------------------------------------------------------------------------------------------------------------------------------------|--------------------------------------------------------------------------------------------------------------------------------------------------------------------------------------------------------------------------------------------------------------------------------------------------------------------------------------------------------------------------------------------------------------------------------------------------------------------------------------------------------------------------------------------------------------------------------------------|
| including justification                                                                                                                    | Figure 1                                                                                                                                                                                                                                                                                                                                                                                                                                                                                                                                                                                   |
| Method of addressing articles published in languages other than English                                                                    | Methods/ Data sources and searches. No exclusions on basis of language. No studies were identified that were not published in English                                                                                                                                                                                                                                                                                                                                                                                                                                                      |
| Method of handling abstracts and unpublished studies                                                                                       | Methods/ Data sources and searches. We did not include studies only published as abstracts                                                                                                                                                                                                                                                                                                                                                                                                                                                                                                 |
| Description of any contact with authors                                                                                                    | Methods/ Data extraction and Quality assessment/Discussion. We did not approach authors of studies with pain measured at follow up but not reported as proportions with degrees of pain. In recent reviews (Beswick et al. Lancet 2008, Beswick et al. Reviews in Clinical Gerontology 2010) we had additional data provided by under half of authors. Recent review by Mullan et al. 2009 suggests this is a common issue in reviews. This is considered in Discussion.<br><u>Authors of studies with appropriate data but with specific missing information were contacted by email.</u> |
| <b>Reporting of methods should include</b>                                                                                                 |                                                                                                                                                                                                                                                                                                                                                                                                                                                                                                                                                                                            |
| Description of relevance or appropriateness of studies assembled for assessing the hypothesis to be tested                                 | Results                                                                                                                                                                                                                                                                                                                                                                                                                                                                                                                                                                                    |
| Rationale for the selection and coding of data (eg, sound clinical principles or convenience)                                              | Results/ Data synthesis and analysis                                                                                                                                                                                                                                                                                                                                                                                                                                                                                                                                                       |
| Documentation of how data were classified and coded (eg, multiple raters, blinding, and interrater reliability)                            | Results/ Study selection/ Data extraction/ and Quality assessment                                                                                                                                                                                                                                                                                                                                                                                                                                                                                                                          |
| Assessment of confounding (eg, comparability of cases and controls in studies where appropriate)                                           | We identified only studies where populations were representative of the population receiving joint replacement                                                                                                                                                                                                                                                                                                                                                                                                                                                                             |
| Assessment of study quality, including blinding of quality assessors; stratification or regression on possible predictors of study results | To assess whether -studies were representative of the joint replacement population we assessed quality of studies based on: blind outcome assessment, incompleteness of outcome data collection, and other sources of bias (representativeness of study population). These are describe in Methods/ Study quality, Appendix 3, and throughout the Results section                                                                                                                                                                                                                          |
| Assessment of heterogeneity                                                                                                                | In Results/ Overview we have considered quality of studies as a source of heterogeneity. In Discussion paragraph 7                                                                                                                                                                                                                                                                                                                                                                                                                                                                         |



|                                                                                                                                                                                                                                                                              |                                                                                                                                                                                                                                                                                                              |
|------------------------------------------------------------------------------------------------------------------------------------------------------------------------------------------------------------------------------------------------------------------------------|--------------------------------------------------------------------------------------------------------------------------------------------------------------------------------------------------------------------------------------------------------------------------------------------------------------|
|                                                                                                                                                                                                                                                                              | we explain why the dataset is limited with regard to heterogeneity analyses.                                                                                                                                                                                                                                 |
| Description of statistical methods (eg, complete description of fixed or random effects models, justification of whether the chosen models account for predictors of study results, dose-response models, or cumulative meta-analysis) in sufficient detail to be replicated | No analysis with combination was possible as described in Discussion paragraph 2.                                                                                                                                                                                                                            |
| Provision of appropriate tables and graphics                                                                                                                                                                                                                                 | Results summarised in Figure 2 and Table 1. Also Study flow diagram in Figure 1, Search strategy in Appendix 2, Quality assessments in Appendix 3 and Pain outcomes in Appendix 4.                                                                                                                           |
| <b>Reporting of results should include</b>                                                                                                                                                                                                                                   |                                                                                                                                                                                                                                                                                                              |
| Graphic summarizing individual study estimates and overall estimate                                                                                                                                                                                                          | Figure 2 and Results section                                                                                                                                                                                                                                                                                 |
| Table giving descriptive information for each study included                                                                                                                                                                                                                 | Table 1                                                                                                                                                                                                                                                                                                      |
| Results of sensitivity testing (eg, subgroup analysis)                                                                                                                                                                                                                       | Not possible due to range of outcome measures.                                                                                                                                                                                                                                                               |
| Indication of statistical uncertainty of findings                                                                                                                                                                                                                            | Discussed in detail in Results section and Discussion                                                                                                                                                                                                                                                        |
| <b>Reporting of discussion should include</b>                                                                                                                                                                                                                                |                                                                                                                                                                                                                                                                                                              |
| Quantitative assessment of bias (eg, publication bias)                                                                                                                                                                                                                       | Risk of bias table showing quality/ representativeness of studies included as Appendix 3. Considered extensively in Results sections: we used number of study centres and losses to follow up as markers of representativeness.                                                                              |
| Justification for exclusion (eg, exclusion of non-English-language citations)                                                                                                                                                                                                | No exclusions on the basis of language of publication.                                                                                                                                                                                                                                                       |
| Assessment of quality of included studies                                                                                                                                                                                                                                    | As described in Methods/ Quality assessment we used relevant issues from the Cochrane risk of bias table. Specifically these were: blind outcome assessment, incompleteness of outcome data collection, and representativeness of the study cohort. These are then applied in detail in the Results section. |
| <b>Reporting of conclusions should include</b>                                                                                                                                                                                                                               |                                                                                                                                                                                                                                                                                                              |
| Consideration of alternative explanations for observed results                                                                                                                                                                                                               | In the Introduction paragraph 5 and Discussion paragraph 11 we consider the possibility that patients lost to follow up have different pain outcomes than those followed up.                                                                                                                                 |
| Generalisation of the conclusions (ie, appropriate for the data presented and within the domain of the literature review)                                                                                                                                                    | We think that reporting the proportion of people with a poor pain outcome across the studies is the best approach. A measured speculation on outcomes of                                                                                                                                                     |

|                                |                                                                                                               |
|--------------------------------|---------------------------------------------------------------------------------------------------------------|
|                                | those lost to follow up seems appropriate in Results/ Overview.                                               |
| Guidelines for future research | Discussion paragraph 12 and 13 discuss possible interventions based on determinants of good and bad outcomes. |
| Disclosure of funding source   | Funding described                                                                                             |

For peer review only

## Appendix 2. MEDLINE search strategy

1. Arthroplasty, Replacement, Knee/ or Arthroplasty, Replacement, Hip/
2. exp Arthroplasty, Replacement, Hip/ or exp Hip Prosthesis/ or hip replacement.mp.
3. 1 or 2
4. exp Arthroplasty, Replacement, Knee/ or exp Knee Prosthesis/ or knee replacement.mp.
5. knee prosthesis.mp. or exp Knee Prosthesis/
6. 4 or 5
7. 6 or 3
8. hip prosthesis.mp. or exp Hip Prosthesis/
9. 8 or 7
10. total hip.tw.
11. total knee.tw.
12. 11 or 10 or 9
13. Orthopedic Procedures/ or orthopaedic surgery.mp.
14. 12 or 13
15. survey.mp. or exp Data Collection/
16. randomized controlled trial.mp. or exp Randomized Controlled Trials/
17. prospective study.mp. or exp Prospective Studies/
18. observational study.mp.
19. Comparative Study/
20. exp EPIDEMIOLOGY/ or epidemiology.mp.
21. longitudinal study.mp. or exp Longitudinal Studies/
22. case control study.mp. or exp Case-Control Studies/
23. evaluation study.mp. or exp Evaluation Studies/
24. follow up study.mp. or exp Follow-Up Studies/
25. 15 or 16 or 17 or 18 or 19 or 20 or 21 or 22 or 23 or 24
26. 25 and 14
27. osteoarthritis.mp. or Osteoarthritis, Hip/ or Osteoarthritis/ or Osteoarthritis, Knee/
28. 26 and 27
29. WOMAC.mp.
30. western ontario.mp.
31. american knee.mp.
32. aks.mp.
33. arthritis impact.mp.
34. oxford hip.mp.
35. oxford knee.mp.
36. hoos.mp.
37. koos.mp.
38. lequesne.mp.
39. self appraisal.mp.
40. vas.mp.
41. visual analogue.mp.
42. osteoarthritis outcome score.mp.
43. 29 or 30 or 31 or 32 or 33 or 34 or 35 or 36 or 37 or 38 or 39 or 40 or 41 or 42
44. 28 and 43

### Appendix 43. Unfavourable pain outcome reported in included studies

| <b>Hip replacement</b>     |                                                                                                     |                                                                                                                                                                               |
|----------------------------|-----------------------------------------------------------------------------------------------------|-------------------------------------------------------------------------------------------------------------------------------------------------------------------------------|
| Nikolajson et al. 2006[23] | Authors' own scale of presence of hip pain and impact on daily life                                 | Pain with moderate, severe or very severe impact on daily life                                                                                                                |
| Jones et al. 2000[24]      | WOMAC pain                                                                                          | Moderate/ severe pain defined as a gain of less than 10 points on the 100 point WOMAC pain dimension (representing a gain of at least 60% of the baseline standard deviation) |
| Quintana et al. 2006[30]   | WOMAC pain                                                                                          | Patients reporting no improvement in pain greater than minimal clinical important difference 24.55/100                                                                        |
| Nilsdotter et al. 2003[26] | WOMAC pain                                                                                          | Pain improved by less than 10/ 100 units reflecting no detectable clinical improvement                                                                                        |
| Singh & Lewallen 2010[27]  | Single question: How much pain do you have in your operated hip?<br>None, mild, moderate or severe. | Moderate or severe pain                                                                                                                                                       |
| Wylde et al. 2011[28]      | WOMAC pain                                                                                          | Moderate or severe persistent pain for 3 months in replaced hip, WOMAC 0–75/100                                                                                               |
| <b>Knee replacement</b>    |                                                                                                     |                                                                                                                                                                               |
| Baker et al. 2007[31]      | Oxford knee score pain dimension                                                                    | Persistent knee pain                                                                                                                                                          |
| Jones et al. 2000[24]      | WOMAC pain                                                                                          | Moderate/ severe pain defined as an improvement of less than 10 points on the WOMAC pain dimension                                                                            |
| Quintana et al. 2006[30]   | WOMAC pain                                                                                          | Patients reporting no improvement in pain greater than minimal clinical important                                                                                             |

1  
2  
3  
4  
5  
6  
7  
8  
9  
10  
11  
12  
13  
14  
15  
16  
17  
18  
19  
20  
21  
22  
23  
24  
25  
26  
27  
28  
29  
30  
31  
32  
33  
34  
35  
36  
37  
38  
39  
40  
41  
42  
43  
44  
45  
46  
47  
48  
49  
50  
51  
52  
53  
54  
55  
56  
57  
58  
59  
60

|                               |                                            |                                                                                    |
|-------------------------------|--------------------------------------------|------------------------------------------------------------------------------------|
|                               |                                            | difference 22.6/100                                                                |
| Núñez et al.<br>2007[35]      | WOMAC pain                                 | No improvement in postoperative pain scores                                        |
| Stephens 2002[34]             | WOMAC                                      | No change or increase in pain                                                      |
| Lundblad et al.<br>2008[37]   | VAS pain                                   | Pain at rest and movement                                                          |
| Nilsdotter et al.<br>2009[36] | KOOS pain compared<br>with pre-operatively | Similar or more pain than pre-operatively                                          |
| Vuorenmaa<br>2008[38]         | VAS pain                                   | Moderate or severe pain                                                            |
| Czurda et al.<br>2010[32]     | WOMAC pain                                 | Painful knees – moderate or worse response in<br>any WOMAC pain dimension          |
| Wylde et al.<br>2011[28]      | WOMAC pain                                 | Moderate or severe persistent pain for 3<br>months in replaced hip, WOMAC 0–75/100 |
| Brander et al.<br>2003[33]    | VAS pain                                   | Significant pain, VAS score >40                                                    |

## Appendix 4. Risk of bias (Quality of studies: representativeness)

Deleted: 3

| Study                      | Cohort representativeness                                                                                                                       | Exclusions                                                                                                                                                                                                                      | Comparability of cohort<br>Age (SD), % female, indication                                                                    | Outcome assessment<br>Follow up                    |
|----------------------------|-------------------------------------------------------------------------------------------------------------------------------------------------|---------------------------------------------------------------------------------------------------------------------------------------------------------------------------------------------------------------------------------|------------------------------------------------------------------------------------------------------------------------------|----------------------------------------------------|
| <b>Hip replacement</b>     |                                                                                                                                                 |                                                                                                                                                                                                                                 |                                                                                                                              |                                                    |
| <b>Registry</b>            |                                                                                                                                                 |                                                                                                                                                                                                                                 |                                                                                                                              |                                                    |
| Nikolajson et al. 2006[23] | Consecutive patients identified in a national joint registry with 94% of hip replacements recorded. 93.6% response rate to postal questionnaire | Not degenerative hip arthritis<br>Not age 18-90 years<br>Not postero-lateral surgical approach<br>No pre-operative registration of pain<br>Previous or subsequent ipsilateral or contralateral hip operations                   | 71.6 (8.7)<br>% female not reported<br>100% degenerative hip arthritis, operation through a posterolateral surgical approach | Self-completed<br>5.9% lost to follow up           |
| <b>Multiple centres</b>    |                                                                                                                                                 |                                                                                                                                                                                                                                 |                                                                                                                              |                                                    |
| Jones et al. 2000[24]      | Approximately 81% of consecutive patients listed for and who subsequently received joint replacement in health region.                          | On health region waiting list for less than 7 days<br>Non-elective<br>Hemiarthroplasties, revisions and emergency surgery<br>Not resident in health region<br>Age <40 years<br>Non-English speaking<br>Living in long-term care | 68.2 (11.1)<br>60%<br>94% OA                                                                                                 | Self-completed<br>5.8% lost to follow up or died   |
| Quintana et al. 2006[30]   | Consecutive patients scheduled to undergo total hip replacement in 7 teaching hospitals. 82.4% response                                         | Not on waiting list for THR<br>Severe comorbidities, such as cancer, terminal disease, or psychiatric conditions<br>Main diagnosis not hip OA                                                                                   | 69.1<br>48.3%<br>100% OA                                                                                                     | Self-completed (postal)<br>25.5% lost to follow up |
| <b>Single centre</b>       |                                                                                                                                                 |                                                                                                                                                                                                                                 |                                                                                                                              |                                                    |
| Nilsdotter et al. 2003[26] | Consecutive patients at single department of orthopaedics                                                                                       | Not primary unilateral THR<br>Not primary OA                                                                                                                                                                                    | 71 (range 50-92)<br>55%<br>100% OA                                                                                           | Self-completed<br>5.9% lost to follow up           |

1

|    |                           |                                                                                                                                 |                                                                                                                                                                                                                                 |                                                |                                                                                                                            |
|----|---------------------------|---------------------------------------------------------------------------------------------------------------------------------|---------------------------------------------------------------------------------------------------------------------------------------------------------------------------------------------------------------------------------|------------------------------------------------|----------------------------------------------------------------------------------------------------------------------------|
| 8  | Singh & Lewallen 2010[27] | Consecutive patients from single centre joint registry sent postal questionnaire or completed at outpatient clinic or telephone | Not alive at follow up<br>Not primary THA                                                                                                                                                                                       | 65.0 (13.3)<br>51%<br>87% OA                   | Self-completed (postal or in clinic) or administered on telephone by experienced registry staff<br>37.7% lost to follow up |
| 15 | Wylde et al. 2011[28]     | Consecutive patients on an orthopaedic centre database                                                                          | Not primary THR                                                                                                                                                                                                                 | Median 73 range 65-78)<br>63%<br>Majority OA   | Self-completed postal questionnaire<br>47.6% lost to follow up                                                             |
| 19 | <b>Knee replacement</b>   |                                                                                                                                 |                                                                                                                                                                                                                                 |                                                |                                                                                                                            |
| 20 | <b>Registry</b>           |                                                                                                                                 |                                                                                                                                                                                                                                 |                                                |                                                                                                                            |
| 21 | Baker et al. 2007[31]     | Random sample of patients in national joint registry                                                                            | Not primary unilateral TKR<br>No contact details recorded<br>Known to have died                                                                                                                                                 | 70.7 (range 25-98)<br>57% (estimate)<br>96% OA | Self-completed postal questionnaire<br>14.9% lost to follow up                                                             |
| 25 | <b>Multiple centres</b>   |                                                                                                                                 |                                                                                                                                                                                                                                 |                                                |                                                                                                                            |
| 26 | Jones et al. 2000[24]     | Approximately 81% of consecutive patients listed for and who subsequently received joint replacement in health region.          | On health region waiting list for less than 7 days<br>Non-elective<br>Hemiarthroplasties, revisions and emergency surgery<br>Not resident in health region<br>Age <40 years<br>Non-English speaking<br>Living in long-term care | 69.2 (9.2)<br>59%<br>94% OA                    | Self-completed<br>5.8% lost to follow up or died                                                                           |
| 33 | Quintana et al. 2006[30]  | Consecutive patients scheduled to undergo total knee replacement in 7 teaching hospitals. 83.4% response                        | Not on waiting list for TKR<br>Severe comorbidities, such as cancer, terminal disease, or psychiatric conditions<br>Main diagnosis not knee OA                                                                                  | 71.9<br>73%<br>100% OA                         | Self-completed (postal)<br>24.1% lost to follow up                                                                         |
| 37 | <b>Single centre</b>      |                                                                                                                                 |                                                                                                                                                                                                                                 |                                                |                                                                                                                            |

|                            |                                                                                               |                                                                                                                                                                                                                                                                                |                                                      |                                                                                      |
|----------------------------|-----------------------------------------------------------------------------------------------|--------------------------------------------------------------------------------------------------------------------------------------------------------------------------------------------------------------------------------------------------------------------------------|------------------------------------------------------|--------------------------------------------------------------------------------------|
| Núñez et al. 2007[35]      | Consecutive patients at a single tertiary care centre                                         | Not OA grade IV Kellgren and Lawrence criteria grade 4<br>Did not agree to participate and give informed consent (2 out of 90)<br>Functional illiteracy or severe psychopathology                                                                                              | 74.8 (5.6)<br>81%<br>100% OA                         | Self-completed at clinic<br>5.0% lost to follow up                                   |
| Stephens 2002[34]          | Patients referred for and receiving TKR                                                       | Age <50 years<br>Significant cognitive impairment (Telephone Interview for Cognitive Status)                                                                                                                                                                                   | 67.4 (8.1) followed up<br>54% followed up<br>100% OA | Self-completed (postal)<br>7.4% lost to follow up                                    |
| Lundblad et al. 2008[37]   | Patients scheduled for TKR at a single hospital                                               | No consent<br>Not Caucasian<br>Not scheduled for TKR for OA                                                                                                                                                                                                                    | 68 (range 40-80)<br>50.7%<br>100% OA                 | Self-completed postal<br>10.1% lost to follow up                                     |
| Nilsdotter et al. 2009[36] | Patients on waiting list for knee replacement at a single hospital department of orthopaedics | Not primary TKR<br>Not knee OA                                                                                                                                                                                                                                                 | 71 (8)<br>61.8%<br>100% OA                           | Self-completed postal<br>12.7% lost to follow up                                     |
| Vuorenmaa 2008[38]         | Patients referred for and receiving TKR at a single hospital                                  | Age >80 years<br>Knee OA rating not 3-4 by Ahlbäck classification<br>Inflammatory joint disease<br>Early TKR<br>Medical diagnosis of serious disease                                                                                                                           | 70 (5)<br>86%<br>100% OA                             | Self completed VAS pain score at clinic<br>11.8% lost to follow up                   |
| Czurda et al. 2010[32]     | Consecutive patients at single centre                                                         | Not primary TKR<br>Not degenerative OA<br>Rheumatoid arthritis, post-operative infection and/or if the pain they suffered from at the time of follow-up appeared after falling or another traumatic experience<br>Not performed by experienced surgeon<br><18 months follow up | 75-76 (range 45-96)<br>76%<br>100% OA                | Telephone interview with patient-reported outcome measure<br>13.4% lost to follow up |
| Wylde et al. 2011[28]      | Consecutive patients on an orthopaedic centre                                                 | Not primary TKR                                                                                                                                                                                                                                                                | Median 73 (range 28-96)                              | Self-completed postal questionnaire                                                  |



1  
2  
3  
4  
5  
6  
7  
8  
9  
10  
11  
12  
13  
14  
15  
16  
17  
18  
19  
20  
21  
22  
23  
24  
25  
26  
27  
28  
29  
30  
31  
32  
33  
34  
35  
36  
37  
38  
39  
40  
41  
42  
43  
44  
45  
46  
47  
48  
49

|                         |                                                                 |                                                                                                                                                                                                                                                                                       |                              |                                                      |
|-------------------------|-----------------------------------------------------------------|---------------------------------------------------------------------------------------------------------------------------------------------------------------------------------------------------------------------------------------------------------------------------------------|------------------------------|------------------------------------------------------|
| database                |                                                                 |                                                                                                                                                                                                                                                                                       | 59%<br>Majority OA           | 45.3% lost to follow up                              |
| <b>Single surgeon</b>   |                                                                 |                                                                                                                                                                                                                                                                                       |                              |                                                      |
| Brander et al. 2003[33] | Consecutive patients treated by single surgeon at single centre | Not degenerative arthritis<br>Not intact cognitive abilities<br>Younger than 18 years<br>Depression or treatment with antidepressant or anxiolytic<br>Concurrent musculoskeletal diagnosis (fibromyalgia, spinal stenosis, significant ipsilateral hip OA)<br>No signed consent form. | 66 (10.5)<br>55.2%<br>94% OA | Self-completed questionnaire<br>0% lost to follow up |

THR total hip replacement, TKR total knee replacement, OA osteoarthritis, WOMAC Western Ontario and McMaster Universities Arthritis Index, VAS visual analogue scale, KOOS Knee Osteoarthritis Outcome Score
